# Supplementary material for: Enhanced bimolecular exchange reaction through programmed coordination of a five-coordinate oxovanadium complex for efficient redox mediation in dye-sensitized solar cells
Source: Royal Society of Chemistry journal article supplement (doi:10.1039/c3dt51698a), 2013-01-01
Supplement: c3dt51698a.pdf [file c3dt51698a.pdf]

Table 1. Atomic coordinates and  $B_{iso}/B_{eq}$

| atom  | x          | y          | z          | $B_{eq}$ |
|-------|------------|------------|------------|----------|
| V(1)  | 0.19211(9) | 0.2416(1)  | 0.41691(4) | 2.96(2)  |
| S(1)  | 0.3068(1)  | 0.5068(2)  | 0.31472(7) | 2.92(3)  |
| F(1)  | 0.5030(5)  | 0.4086(7)  | 0.2622(2)  | 9.0(2)   |
| F(2)  | 0.3802(6)  | 0.5720(7)  | 0.2122(2)  | 9.4(2)   |
| F(3)  | 0.3222(6)  | 0.3343(7)  | 0.2205(2)  | 10.3(2)  |
| O(1)  | 0.3407(4)  | 0.2630(5)  | 0.4673(2)  | 3.23(9)  |
| O(2)  | 0.1143(4)  | 0.4373(5)  | 0.4145(2)  | 3.29(9)  |
| O(3)  | 0.1005(4)  | 0.1474(5)  | 0.4554(2)  | 4.2(1)   |
| O(4)  | 0.3150(4)  | 0.3601(5)  | 0.3492(2)  | 3.7(1)   |
| O(5)  | 0.1784(4)  | 0.5526(6)  | 0.2908(2)  | 4.8(1)   |
| O(6)  | 0.3885(4)  | 0.6324(5)  | 0.3406(2)  | 4.7(1)   |
| N(1)  | 0.2827(5)  | 0.0467(5)  | 0.3825(2)  | 3.3(1)   |
| N(2)  | 0.0730(5)  | 0.1913(5)  | 0.3394(2)  | 3.4(1)   |
| C(1)  | 0.4664(5)  | 0.2236(7)  | 0.4664(2)  | 2.9(1)   |
| C(2)  | 0.5603(6)  | 0.2998(7)  | 0.5059(3)  | 3.7(1)   |
| C(3)  | 0.6886(6)  | 0.2587(9)  | 0.5053(3)  | 4.5(2)   |
| C(4)  | 0.7265(6)  | 0.1422(9)  | 0.4681(3)  | 4.4(2)   |
| C(5)  | 0.6336(6)  | 0.0629(8)  | 0.4305(3)  | 4.0(2)   |
| C(6)  | 0.5006(5)  | 0.1024(6)  | 0.4288(2)  | 2.8(1)   |
| C(7)  | 0.4046(6)  | 0.0148(7)  | 0.3901(3)  | 3.3(1)   |
| C(8)  | 0.1953(7)  | -0.0507(7) | 0.3410(3)  | 4.7(2)   |
| C(9)  | 0.1163(6)  | 0.0669(8)  | 0.3013(3)  | 4.6(2)   |
| C(10) | -0.0404(6) | 0.2547(8)  | 0.3269(3)  | 3.7(1)   |
| C(11) | -0.0918(6) | 0.3791(8)  | 0.3592(3)  | 3.4(1)   |

Table 1. Atomic coordinates and  $B_{iso}/B_{eq}$  (continued)

| atom  | x          | y          | z         | $B_{eq}$ |
|-------|------------|------------|-----------|----------|
| C(12) | -0.2236(6) | 0.4236(9)  | 0.3468(3) | 4.3(2)   |
| C(13) | -0.2744(6) | 0.5474(10) | 0.3745(3) | 5.0(2)   |
| C(14) | -0.1958(7) | 0.6367(9)  | 0.4154(3) | 4.7(2)   |
| C(15) | -0.0643(6) | 0.6001(8)  | 0.4290(3) | 3.8(2)   |
| C(16) | -0.0125(5) | 0.4717(7)  | 0.4017(3) | 3.1(1)   |
| C(17) | 0.3825(8)  | 0.449(1)   | 0.2496(3) | 5.0(2)   |
| H(2)  | 0.5344     | 0.3795     | 0.5338    | 3.7000   |
| H(3)  | 0.7552     | 0.3136     | 0.5317    | 4.5000   |
| H(4)  | 0.8182     | 0.1162     | 0.4681    | 4.4000   |
| H(5)  | 0.6599     | -0.0210    | 0.4043    | 4.0000   |
| H(7)  | 0.4357     | -0.0732    | 0.3681    | 3.3000   |
| H(8a) | 0.2426     | -0.1229    | 0.3189    | 4.7000   |
| H(8b) | 0.1374     | -0.1139    | 0.3621    | 4.7000   |
| H(9a) | 0.0446     | 0.0170     | 0.2777    | 4.6000   |
| H(9b) | 0.1712     | 0.1129     | 0.2731    | 4.6000   |
| H(10) | -0.0934    | 0.2149     | 0.2914    | 3.8000   |
| H(12) | -0.2805    | 0.3630     | 0.3172    | 4.3000   |
| H(13) | -0.3665    | 0.5744     | 0.3666    | 5.0000   |
| H(14) | -0.2323    | 0.7271     | 0.4348    | 4.7000   |
| H(15) | -0.0099    | 0.6646     | 0.4576    | 3.8000   |

$$B_{eq} = \frac{8}{3}\pi^2(U_{11}(aa^*)^2 + U_{22}(bb^*)^2 + U_{33}(cc^*)^2 + 2U_{12}aa^*bb^* \cos \gamma + 2U_{13}aa^*cc^* \cos \beta + 2U_{23}bb^*cc^* \cos \alpha)$$

Table 2. Anisotropic Displacement Parameters

| atom  | U <sub>11</sub> | U <sub>22</sub> | U <sub>33</sub> | U <sub>12</sub> | U <sub>13</sub> | U <sub>23</sub> |
|-------|-----------------|-----------------|-----------------|-----------------|-----------------|-----------------|
| V(1)  | 0.0378(5)       | 0.0349(6)       | 0.0379(5)       | 0.0087(5)       | -0.0033(4)      | -0.0050(6)      |
| S(1)  | 0.0388(8)       | 0.0339(8)       | 0.0368(8)       | 0.0095(7)       | -0.0022(6)      | 0.0003(7)       |
| F(1)  | 0.082(3)        | 0.170(6)        | 0.091(4)        | 0.054(4)        | 0.024(3)        | -0.022(4)       |
| F(2)  | 0.170(6)        | 0.121(5)        | 0.074(4)        | 0.024(4)        | 0.049(4)        | 0.027(3)        |
| F(3)  | 0.169(6)        | 0.138(5)        | 0.089(4)        | -0.037(4)       | 0.031(4)        | -0.072(4)       |
| O(1)  | 0.040(2)        | 0.045(2)        | 0.036(2)        | 0.011(2)        | -0.004(2)       | -0.009(2)       |
| O(2)  | 0.036(2)        | 0.040(2)        | 0.047(2)        | 0.013(2)        | -0.004(2)       | -0.012(2)       |
| O(3)  | 0.047(3)        | 0.058(3)        | 0.057(3)        | 0.005(2)        | 0.006(2)        | 0.006(2)        |
| O(4)  | 0.046(3)        | 0.041(2)        | 0.052(3)        | 0.013(2)        | 0.002(2)        | 0.007(2)        |
| O(5)  | 0.048(3)        | 0.067(3)        | 0.062(3)        | 0.018(2)        | -0.008(2)       | 0.020(3)        |
| O(6)  | 0.065(3)        | 0.042(3)        | 0.069(3)        | -0.002(2)       | 0.000(2)        | -0.015(2)       |
| N(1)  | 0.049(3)        | 0.025(3)        | 0.049(3)        | 0.004(2)        | -0.005(3)       | -0.006(2)       |
| N(2)  | 0.048(3)        | 0.031(3)        | 0.046(3)        | 0.005(2)        | -0.007(2)       | -0.010(2)       |
| C(1)  | 0.042(3)        | 0.030(3)        | 0.038(3)        | 0.006(3)        | 0.002(3)        | 0.010(3)        |
| C(2)  | 0.051(4)        | 0.042(4)        | 0.043(4)        | 0.004(3)        | -0.011(3)       | 0.003(3)        |
| C(3)  | 0.040(4)        | 0.056(4)        | 0.071(5)        | -0.006(4)       | -0.007(3)       | 0.014(4)        |
| C(4)  | 0.040(4)        | 0.065(5)        | 0.063(5)        | 0.012(4)        | 0.007(3)        | 0.020(4)        |
| C(5)  | 0.052(4)        | 0.051(4)        | 0.050(4)        | 0.016(3)        | 0.011(3)        | 0.011(3)        |
| C(6)  | 0.039(3)        | 0.029(3)        | 0.036(3)        | 0.009(3)        | 0.003(3)        | 0.010(3)        |
| C(7)  | 0.059(4)        | 0.029(3)        | 0.037(3)        | 0.012(3)        | 0.012(3)        | 0.001(3)        |
| C(8)  | 0.063(5)        | 0.032(3)        | 0.079(5)        | 0.004(3)        | -0.008(4)       | -0.014(4)       |
| C(9)  | 0.059(4)        | 0.052(4)        | 0.059(4)        | 0.008(4)        | -0.021(4)       | -0.023(4)       |
| C(10) | 0.041(3)        | 0.048(4)        | 0.050(4)        | 0.003(3)        | -0.012(3)       | 0.001(4)        |
| C(11) | 0.042(4)        | 0.049(4)        | 0.036(3)        | 0.004(3)        | -0.001(3)       | 0.005(3)        |

Table 2. Anisotropic Displacement Parameters (continued)

| atom  | U <sub>11</sub> | U <sub>22</sub> | U <sub>33</sub> | U <sub>12</sub> | U <sub>13</sub> | U <sub>23</sub> |
|-------|-----------------|-----------------|-----------------|-----------------|-----------------|-----------------|
| C(12) | 0.034(4)        | 0.062(5)        | 0.063(5)        | 0.008(3)        | -0.011(3)       | 0.009(4)        |
| C(13) | 0.038(4)        | 0.081(6)        | 0.068(5)        | 0.022(4)        | -0.001(4)       | 0.019(4)        |
| C(14) | 0.059(5)        | 0.071(5)        | 0.052(4)        | 0.029(4)        | 0.011(4)        | 0.003(4)        |
| C(15) | 0.053(4)        | 0.053(4)        | 0.039(4)        | 0.022(3)        | 0.002(3)        | -0.004(3)       |
| C(16) | 0.038(3)        | 0.038(4)        | 0.039(3)        | 0.011(3)        | 0.001(3)        | 0.005(3)        |
| C(17) | 0.074(6)        | 0.068(5)        | 0.048(5)        | 0.012(4)        | 0.000(4)        | -0.004(4)       |

The general temperature factor expression:

$$\exp(-2\pi^2(a^*{}^2U_{11}h^2 + b^*{}^2U_{22}k^2 + c^*{}^2U_{33}l^2 + 2a^*b^*U_{12}hk + 2a^*c^*U_{13}hl + 2b^*c^*U_{23}kl))$$

Table 3. Bond Lengths(Å)

| atom  | atom  | distance  | atom  | atom  | distance |
|-------|-------|-----------|-------|-------|----------|
| V(1)  | O(1)  | 1.813(4)  | V(1)  | O(2)  | 1.825(4) |
| V(1)  | O(3)  | 1.575(4)  | V(1)  | O(4)  | 2.330(4) |
| V(1)  | N(1)  | 2.081(5)  | V(1)  | N(2)  | 2.067(5) |
| S(1)  | O(4)  | 1.454(4)  | S(1)  | O(5)  | 1.428(5) |
| S(1)  | O(6)  | 1.432(4)  | S(1)  | C(17) | 1.817(8) |
| F(1)  | C(17) | 1.292(9)  | F(2)  | C(17) | 1.333(9) |
| F(3)  | C(17) | 1.287(9)  | O(1)  | C(1)  | 1.346(7) |
| O(2)  | C(16) | 1.343(7)  | N(1)  | C(7)  | 1.281(7) |
| N(1)  | C(8)  | 1.473(8)  | N(2)  | C(9)  | 1.459(8) |
| N(2)  | C(10) | 1.289(7)  | C(1)  | C(2)  | 1.397(8) |
| C(1)  | C(6)  | 1.399(8)  | C(2)  | C(3)  | 1.374(9) |
| C(3)  | C(4)  | 1.377(10) | C(4)  | C(5)  | 1.378(9) |
| C(5)  | C(6)  | 1.412(8)  | C(6)  | C(7)  | 1.446(8) |
| C(8)  | C(9)  | 1.509(9)  | C(10) | C(11) | 1.415(9) |
| C(11) | C(12) | 1.410(8)  | C(11) | C(16) | 1.420(8) |
| C(12) | C(13) | 1.352(10) | C(13) | C(14) | 1.38(1)  |
| C(14) | C(15) | 1.395(9)  | C(15) | C(16) | 1.381(8) |

Table 4. Bond Lengths(Å)

| atom  | atom  | distance | atom  | atom  | distance |
|-------|-------|----------|-------|-------|----------|
| C(2)  | H(2)  | 0.98     | C(3)  | H(3)  | 0.97     |
| C(4)  | H(4)  | 0.98     | C(5)  | H(5)  | 0.98     |
| C(7)  | H(7)  | 0.97     | C(8)  | H(8a) | 0.96     |
| C(8)  | H(8b) | 0.97     | C(9)  | H(9a) | 0.96     |
| C(9)  | H(9b) | 0.98     | C(10) | H(10) | 0.98     |
| C(12) | H(12) | 0.98     | C(13) | H(13) | 0.98     |
| C(14) | H(14) | 0.97     | C(15) | H(15) | 0.97     |

Table 5. Bond Angles(°)

| atom  | atom  | atom  | angle    | atom  | atom  | atom  | angle    |
|-------|-------|-------|----------|-------|-------|-------|----------|
| O(1)  | V(1)  | O(2)  | 105.6(2) | O(1)  | V(1)  | O(3)  | 102.8(2) |
| O(1)  | V(1)  | O(4)  | 83.4(2)  | O(1)  | V(1)  | N(1)  | 85.8(2)  |
| O(1)  | V(1)  | N(2)  | 158.8(2) | O(2)  | V(1)  | O(3)  | 100.0(2) |
| O(2)  | V(1)  | O(4)  | 82.6(2)  | O(2)  | V(1)  | N(1)  | 155.6(2) |
| O(2)  | V(1)  | N(2)  | 86.6(2)  | O(3)  | V(1)  | O(4)  | 172.2(2) |
| O(3)  | V(1)  | N(1)  | 98.2(2)  | O(3)  | V(1)  | N(2)  | 91.8(2)  |
| O(4)  | V(1)  | N(1)  | 77.4(2)  | O(4)  | V(1)  | N(2)  | 81.0(2)  |
| N(1)  | V(1)  | N(2)  | 76.8(2)  | O(4)  | S(1)  | O(5)  | 115.1(3) |
| O(4)  | S(1)  | O(6)  | 114.0(3) | O(4)  | S(1)  | C(17) | 102.1(3) |
| O(5)  | S(1)  | O(6)  | 115.9(3) | O(5)  | S(1)  | C(17) | 103.6(3) |
| O(6)  | S(1)  | C(17) | 103.7(3) | V(1)  | O(1)  | C(1)  | 135.7(4) |
| V(1)  | O(2)  | C(16) | 128.1(4) | V(1)  | O(4)  | S(1)  | 135.5(2) |
| V(1)  | N(1)  | C(7)  | 126.4(4) | V(1)  | N(1)  | C(8)  | 113.9(4) |
| C(7)  | N(1)  | C(8)  | 119.4(5) | V(1)  | N(2)  | C(9)  | 117.0(4) |
| V(1)  | N(2)  | C(10) | 122.7(4) | C(9)  | N(2)  | C(10) | 120.0(5) |
| O(1)  | C(1)  | C(2)  | 118.6(5) | O(1)  | C(1)  | C(6)  | 120.2(5) |
| C(2)  | C(1)  | C(6)  | 121.1(5) | C(1)  | C(2)  | C(3)  | 118.6(6) |
| C(2)  | C(3)  | C(4)  | 122.0(6) | C(3)  | C(4)  | C(5)  | 119.5(6) |
| C(4)  | C(5)  | C(6)  | 120.7(6) | C(1)  | C(6)  | C(5)  | 118.0(6) |
| C(1)  | C(6)  | C(7)  | 122.2(5) | C(5)  | C(6)  | C(7)  | 119.8(6) |
| N(1)  | C(7)  | C(6)  | 124.9(5) | N(1)  | C(8)  | C(9)  | 105.5(5) |
| N(2)  | C(9)  | C(8)  | 107.3(5) | N(2)  | C(10) | C(11) | 125.3(5) |
| C(10) | C(11) | C(12) | 120.4(6) | C(10) | C(11) | C(16) | 122.1(5) |
| C(12) | C(11) | C(16) | 117.3(6) | C(11) | C(12) | C(13) | 122.0(6) |

Table 5. Bond Angles(°) (continued)

| atom  | atom  | atom  | angle    | atom  | atom  | atom  | angle    |
|-------|-------|-------|----------|-------|-------|-------|----------|
| C(12) | C(13) | C(14) | 119.9(6) | C(13) | C(14) | C(15) | 120.7(6) |
| C(14) | C(15) | C(16) | 119.6(6) | O(2)  | C(16) | C(11) | 120.1(5) |
| O(2)  | C(16) | C(15) | 119.5(5) | C(11) | C(16) | C(15) | 120.4(5) |
| S(1)  | C(17) | F(1)  | 112.9(5) | S(1)  | C(17) | F(2)  | 109.6(6) |
| S(1)  | C(17) | F(3)  | 112.7(6) | F(1)  | C(17) | F(2)  | 106.7(7) |
| F(1)  | C(17) | F(3)  | 108.3(7) | F(2)  | C(17) | F(3)  | 106.2(7) |



Table 6. Bond Angles(°)

| atom  | atom  | atom  | angle | atom  | atom  | atom  | angle |
|-------|-------|-------|-------|-------|-------|-------|-------|
| C(1)  | C(2)  | H(2)  | 120.3 | C(3)  | C(2)  | H(2)  | 121.1 |
| C(2)  | C(3)  | H(3)  | 119.4 | C(4)  | C(3)  | H(3)  | 118.6 |
| C(3)  | C(4)  | H(4)  | 120.5 | C(5)  | C(4)  | H(4)  | 120.0 |
| C(4)  | C(5)  | H(5)  | 119.8 | C(6)  | C(5)  | H(5)  | 119.4 |
| N(1)  | C(7)  | H(7)  | 118.2 | C(6)  | C(7)  | H(7)  | 116.9 |
| N(1)  | C(8)  | H(8a) | 111.9 | N(1)  | C(8)  | H(8b) | 110.9 |
| C(9)  | C(8)  | H(8a) | 112.0 | C(9)  | C(8)  | H(8b) | 109.2 |
| H(8a) | C(8)  | H(8b) | 107.4 | N(2)  | C(9)  | H(9a) | 111.7 |
| N(2)  | C(9)  | H(9b) | 110.3 | C(8)  | C(9)  | H(9a) | 112.2 |
| C(8)  | C(9)  | H(9b) | 109.3 | H(9a) | C(9)  | H(9b) | 106.1 |
| N(2)  | C(10) | H(10) | 116.7 | C(11) | C(10) | H(10) | 118.0 |
| C(11) | C(12) | H(12) | 119.2 | C(13) | C(12) | H(12) | 118.7 |
| C(12) | C(13) | H(13) | 121.2 | C(14) | C(13) | H(13) | 118.9 |
| C(13) | C(14) | H(14) | 119.7 | C(15) | C(14) | H(14) | 119.5 |
| C(14) | C(15) | H(15) | 119.9 | C(16) | C(15) | H(15) | 120.5 |

10|Fo| vs 10|Fc|

page 1

| k                    | l  | Fo   | Fc   | sigF | k | l  | Fo  | Fc  | sigF | k                    | l   | Fo   | Fc   | sigF |
|----------------------|----|------|------|------|---|----|-----|-----|------|----------------------|-----|------|------|------|
| ^^^^^^ h = 0 ^^^^^^^ |    |      |      |      |   |    |     |     |      |                      |     |      |      |      |
|                      |    |      |      |      | 3 | 8  | 159 | 132 | 11   | 6                    | 16  | 142  | 137  | 19   |
|                      |    |      |      |      | 3 | 9  | 97  | 112 | 16   | 6                    | 17  | 152  | 125  | 18   |
| 0                    | 2  | 52   | 64   | 6    | 3 | 10 | 509 | 507 | 17   | 6                    | 18  | 213  | 222  | 17   |
| 0                    | 4  | 573  | 580  | 18   | 3 | 11 | 108 | 87  | 15   | 6                    | 24  | 221  | 201  | 17   |
| 0                    | 6  | 343  | 323  | 12   | 3 | 12 | 237 | 241 | 12   | 7                    | 1   | 143  | 142  | 15   |
| 0                    | 8  | 746  | 751  | 23   | 3 | 13 | 285 | 288 | 13   | 7                    | 2   | 203  | 211  | 15   |
| 0                    | 10 | 139  | 155  | 11   | 3 | 14 | 258 | 267 | 13   | 7                    | 3   | 419  | 418  | 15   |
| 0                    | 12 | 623  | 606  | 20   | 3 | 16 | 160 | 148 | 14   | 7                    | 4   | 108  | 85   | 13   |
| 0                    | 14 | 220  | 211  | 12   | 3 | 19 | 198 | 213 | 16   | 7                    | 5   | 94   | 80   | 15   |
| 0                    | 16 | 365  | 369  | 14   | 3 | 20 | 193 | 188 | 17   | 7                    | 6   | 203  | 218  | 14   |
| 0                    | 18 | 427  | 434  | 16   | 3 | 22 | 307 | 307 | 15   | 7                    | 7   | 96   | 57   | 15   |
| 0                    | 20 | 139  | 150  | 18   | 4 | 0  | 547 | 564 | 18   | 7                    | 9   | 241  | 223  | 14   |
| 0                    | 24 | 173  | 176  | 19   | 4 | 1  | 133 | 124 | 11   | 7                    | 10  | 143  | 132  | 18   |
| 0                    | 26 | 213  | 217  | 17   | 4 | 2  | 266 | 256 | 11   | 7                    | 11  | 165  | 173  | 17   |
| 1                    | 1  | 287  | 276  | 9    | 4 | 3  | 355 | 347 | 13   | 7                    | 14  | 131  | 140  | 20   |
| 1                    | 2  | 1662 | 1669 | 50   | 4 | 4  | 100 | 84  | 12   | 7                    | 16  | 140  | 152  | 21   |
| 1                    | 3  | 843  | 818  | 26   | 4 | 5  | 85  | 40  | 14   | 7                    | 20  | 149  | 158  | 15   |
| 1                    | 4  | 918  | 897  | 28   | 4 | 6  | 188 | 191 | 11   | 7                    | 22  | 134  | 135  | 19   |
| 1                    | 6  | 438  | 430  | 14   | 4 | 8  | 228 | 219 | 11   | 8                    | 0   | 335  | 333  | 15   |
| 1                    | 7  | 335  | 318  | 12   | 4 | 9  | 320 | 288 | 13   | 8                    | 2   | 111  | 110  | 15   |
| 1                    | 8  | 248  | 199  | 10   | 4 | 10 | 788 | 782 | 25   | 8                    | 5   | 152  | 119  | 16   |
| 1                    | 9  | 248  | 255  | 10   | 4 | 11 | 462 | 448 | 16   | 8                    | 8   | 223  | 216  | 15   |
| 1                    | 10 | 318  | 322  | 12   | 4 | 12 | 356 | 355 | 14   | 8                    | 11  | 151  | 139  | 18   |
| 1                    | 11 | 494  | 477  | 16   | 4 | 13 | 468 | 485 | 17   | 8                    | 12  | 157  | 138  | 18   |
| 1                    | 13 | 212  | 227  | 13   | 4 | 14 | 404 | 405 | 15   | 8                    | 15  | 185  | 180  | 18   |
| 1                    | 14 | 390  | 390  | 14   | 4 | 15 | 134 | 142 | 18   | 8                    | 18  | 167  | 159  | 18   |
| 1                    | 16 | 188  | 172  | 13   | 4 | 16 | 127 | 122 | 18   | 9                    | 2   | 132  | 126  | 19   |
| 1                    | 18 | 148  | 182  | 19   | 4 | 18 | 239 | 223 | 15   | 9                    | 3   | 142  | 164  | 21   |
| 1                    | 19 | 219  | 263  | 18   | 4 | 19 | 163 | 177 | 18   | 9                    | 4   | 250  | 257  | 16   |
| 1                    | 20 | 302  | 343  | 17   | 4 | 20 | 142 | 157 | 19   | 9                    | 5   | 216  | 204  | 16   |
| 1                    | 21 | 270  | 301  | 17   | 4 | 22 | 208 | 192 | 15   | 9                    | 7   | 132  | 121  | 19   |
| 1                    | 22 | 242  | 258  | 17   | 5 | 1  | 83  | 79  | 13   | 9                    | 8   | 118  | 98   | 15   |
| 2                    | 0  | 423  | 435  | 13   | 5 | 2  | 629 | 622 | 20   | 9                    | 9   | 122  | 64   | 19   |
| 2                    | 1  | 199  | 214  | 8    | 5 | 3  | 116 | 115 | 15   | 9                    | 13  | 146  | 100  | 19   |
| 2                    | 2  | 1662 | 1676 | 51   | 5 | 4  | 569 | 559 | 18   | 10                   | 0   | 125  | 142  | 17   |
| 2                    | 3  | 983  | 945  | 30   | 5 | 5  | 479 | 473 | 16   |                      |     |      |      |      |
| 2                    | 4  | 697  | 671  | 21   | 5 | 7  | 138 | 127 | 15   | ^^^^^^ h = 1 ^^^^^^^ |     |      |      |      |
| 2                    | 5  | 719  | 697  | 22   | 5 | 8  | 675 | 644 | 22   |                      |     |      |      |      |
| 2                    | 6  | 183  | 148  | 10   | 5 | 10 | 339 | 343 | 14   | 0                    | -28 | 289  | 306  | 18   |
| 2                    | 7  | 685  | 669  | 21   | 5 | 11 | 226 | 229 | 13   | 0                    | -26 | 126  | 143  | 19   |
| 2                    | 9  | 473  | 461  | 16   | 5 | 12 | 151 | 190 | 16   | 0                    | -24 | 148  | 163  | 21   |
| 2                    | 10 | 346  | 334  | 13   | 5 | 13 | 344 | 341 | 14   | 0                    | -22 | 187  | 174  | 16   |
| 2                    | 11 | 261  | 278  | 12   | 5 | 14 | 334 | 342 | 15   | 0                    | -20 | 318  | 327  | 15   |
| 2                    | 12 | 502  | 493  | 17   | 5 | 15 | 149 | 164 | 17   | 0                    | -18 | 126  | 114  | 17   |
| 2                    | 13 | 144  | 148  | 13   | 5 | 16 | 150 | 175 | 19   | 0                    | -16 | 348  | 348  | 14   |
| 2                    | 14 | 228  | 246  | 12   | 5 | 17 | 137 | 153 | 20   | 0                    | -12 | 335  | 327  | 13   |
| 2                    | 16 | 514  | 520  | 18   | 5 | 20 | 128 | 126 | 16   | 0                    | -10 | 875  | 878  | 27   |
| 2                    | 18 | 111  | 128  | 15   | 5 | 21 | 132 | 111 | 20   | 0                    | -8  | 938  | 916  | 29   |
| 2                    | 19 | 132  | 167  | 19   | 5 | 22 | 213 | 223 | 18   | 0                    | -6  | 409  | 387  | 13   |
| 2                    | 20 | 179  | 173  | 15   | 5 | 25 | 139 | 112 | 16   | 0                    | -4  | 1175 | 1181 | 35   |
| 2                    | 22 | 109  | 98   | 18   | 6 | 0  | 407 | 405 | 15   | 0                    | -2  | 1224 | 1240 | 37   |
| 2                    | 23 | 141  | 178  | 23   | 6 | 1  | 194 | 207 | 12   | 0                    | 0   | 436  | 438  | 13   |
| 2                    | 24 | 261  | 280  | 16   | 6 | 2  | 358 | 359 | 14   | 0                    | 2   | 1792 | 1821 | 54   |
| 3                    | 1  | 106  | 101  | 12   | 6 | 5  | 229 | 223 | 13   | 0                    | 4   | 1315 | 1317 | 40   |
| 3                    | 2  | 318  | 337  | 11   | 6 | 6  | 529 | 527 | 18   | 0                    | 8   | 630  | 623  | 20   |
| 3                    | 4  | 199  | 231  | 10   | 6 | 11 | 203 | 210 | 14   | 0                    | 10  | 492  | 497  | 16   |
| 3                    | 5  | 446  | 457  | 15   | 6 | 12 | 221 | 241 | 14   | 0                    | 12  | 785  | 759  | 24   |
| 3                    | 6  | 117  | 105  | 13   | 6 | 13 | 142 | 138 | 18   | 0                    | 14  | 439  | 434  | 15   |
| 3                    | 7  | 690  | 670  | 22   | 6 | 14 | 354 | 330 | 15   | 0                    | 16  | 112  | 114  | 18   |

10|Fo| vs 10|Fc|

page 2

| k | l   | Fo   | Fc   | sigF | k | l   | Fo  | Fc   | sigF | k | l   | Fo   | Fc   | sigF |
|---|-----|------|------|------|---|-----|-----|------|------|---|-----|------|------|------|
| 0 | 18  | 97   | 126  | 16   | 2 | 4   | 826 | 839  | 25   | 4 | -4  | 588  | 578  | 19   |
| 0 | 20  | 257  | 247  | 14   | 2 | 6   | 349 | 354  | 12   | 4 | -3  | 677  | 645  | 21   |
| 1 | -26 | 187  | 235  | 22   | 2 | 8   | 169 | 202  | 11   | 4 | -2  | 1126 | 1097 | 34   |
| 1 | -24 | 290  | 295  | 17   | 2 | 10  | 206 | 217  | 11   | 4 | -1  | 508  | 462  | 16   |
| 1 | -20 | 166  | 166  | 16   | 2 | 12  | 84  | 64   | 13   | 4 | 2   | 391  | 426  | 14   |
| 1 | -18 | 376  | 382  | 15   | 2 | 13  | 100 | 75   | 12   | 4 | 3   | 358  | 354  | 13   |
| 1 | -17 | 252  | 274  | 14   | 2 | 14  | 387 | 385  | 14   | 4 | 4   | 150  | 124  | 11   |
| 1 | -16 | 260  | 271  | 14   | 2 | 15  | 116 | 143  | 19   | 4 | 5   | 86   | 37   | 15   |
| 1 | -14 | 286  | 294  | 12   | 2 | 16  | 553 | 559  | 19   | 4 | 6   | 230  | 209  | 11   |
| 1 | -12 | 332  | 334  | 13   | 2 | 18  | 175 | 177  | 15   | 4 | 7   | 136  | 128  | 12   |
| 1 | -10 | 348  | 328  | 12   | 2 | 19  | 133 | 168  | 21   | 4 | 8   | 577  | 560  | 19   |
| 1 | -9  | 935  | 927  | 29   | 2 | 20  | 168 | 174  | 18   | 4 | 9   | 138  | 116  | 13   |
| 1 | -8  | 257  | 270  | 11   | 2 | 22  | 216 | 237  | 16   | 4 | 10  | 264  | 276  | 12   |
| 1 | -7  | 1282 | 1284 | 39   | 2 | 26  | 180 | 177  | 19   | 4 | 11  | 153  | 149  | 15   |
| 1 | -6  | 1565 | 1578 | 47   | 3 | -21 | 135 | 135  | 20   | 4 | 12  | 706  | 704  | 23   |
| 1 | -5  | 1590 | 1589 | 48   | 3 | -19 | 334 | 335  | 15   | 4 | 13  | 315  | 310  | 14   |
| 1 | -4  | 954  | 975  | 29   | 3 | -17 | 294 | 311  | 14   | 4 | 14  | 336  | 332  | 14   |
| 1 | -3  | 1134 | 1133 | 34   | 3 | -16 | 298 | 293  | 13   | 4 | 15  | 156  | 147  | 16   |
| 1 | -2  | 917  | 938  | 28   | 3 | -14 | 305 | 319  | 13   | 4 | 17  | 131  | 126  | 19   |
| 1 | -1  | 80   | 106  | 9    | 3 | -11 | 128 | 158  | 16   | 4 | 18  | 166  | 186  | 17   |
| 1 | 0   | 1114 | 1090 | 34   | 3 | -10 | 426 | 394  | 15   | 4 | 20  | 298  | 307  | 15   |
| 1 | 1   | 1071 | 1065 | 32   | 3 | -9  | 731 | 744  | 23   | 4 | 22  | 163  | 172  | 19   |
| 1 | 2   | 210  | 203  | 8    | 3 | -8  | 997 | 1012 | 31   | 4 | 23  | 120  | 92   | 17   |
| 1 | 3   | 805  | 797  | 24   | 3 | -5  | 411 | 412  | 14   | 4 | 24  | 111  | 73   | 17   |
| 1 | 5   | 380  | 376  | 12   | 3 | -4  | 129 | 150  | 11   | 5 | -24 | 160  | 181  | 23   |
| 1 | 6   | 977  | 969  | 30   | 3 | -2  | 319 | 323  | 11   | 5 | -23 | 164  | 176  | 21   |
| 1 | 8   | 470  | 449  | 15   | 3 | -1  | 371 | 356  | 13   | 5 | -20 | 220  | 254  | 18   |
| 1 | 9   | 143  | 142  | 11   | 3 | 0   | 733 | 749  | 23   | 5 | -18 | 214  | 196  | 15   |
| 1 | 10  | 410  | 416  | 14   | 3 | 1   | 604 | 590  | 19   | 5 | -17 | 151  | 136  | 17   |
| 1 | 11  | 200  | 190  | 11   | 3 | 2   | 203 | 215  | 10   | 5 | -13 | 235  | 242  | 13   |
| 1 | 12  | 248  | 261  | 12   | 3 | 3   | 139 | 119  | 10   | 5 | -12 | 281  | 278  | 13   |
| 1 | 13  | 209  | 215  | 12   | 3 | 5   | 100 | 62   | 13   | 5 | -11 | 298  | 285  | 13   |
| 1 | 14  | 136  | 124  | 14   | 3 | 6   | 303 | 316  | 11   | 5 | -10 | 177  | 175  | 13   |
| 1 | 15  | 176  | 165  | 14   | 3 | 7   | 414 | 407  | 14   | 5 | -9  | 242  | 237  | 12   |
| 1 | 16  | 335  | 325  | 14   | 3 | 8   | 101 | 104  | 16   | 5 | -8  | 238  | 241  | 12   |
| 1 | 18  | 301  | 306  | 14   | 3 | 9   | 598 | 601  | 19   | 5 | -7  | 164  | 153  | 13   |
| 1 | 20  | 132  | 163  | 16   | 3 | 10  | 221 | 223  | 11   | 5 | -6  | 708  | 702  | 22   |
| 1 | 21  | 216  | 211  | 15   | 3 | 12  | 487 | 477  | 17   | 5 | -4  | 219  | 197  | 11   |
| 1 | 23  | 131  | 113  | 15   | 3 | 13  | 248 | 243  | 13   | 5 | -3  | 269  | 257  | 12   |
| 2 | -26 | 152  | 147  | 22   | 3 | 15  | 319 | 324  | 14   | 5 | -2  | 517  | 526  | 17   |
| 2 | -22 | 213  | 193  | 14   | 3 | 16  | 430 | 441  | 16   | 5 | -1  | 403  | 394  | 14   |
| 2 | -18 | 137  | 142  | 17   | 3 | 17  | 203 | 209  | 15   | 5 | 0   | 294  | 288  | 12   |
| 2 | -16 | 195  | 191  | 13   | 3 | 18  | 461 | 456  | 17   | 5 | 1   | 87   | 78   | 12   |
| 2 | -15 | 136  | 140  | 17   | 3 | 20  | 248 | 250  | 15   | 5 | 2   | 349  | 353  | 13   |
| 2 | -14 | 521  | 533  | 17   | 3 | 21  | 148 | 160  | 19   | 5 | 3   | 214  | 215  | 11   |
| 2 | -13 | 124  | 111  | 15   | 3 | 22  | 109 | 105  | 18   | 5 | 4   | 366  | 370  | 13   |
| 2 | -12 | 552  | 549  | 18   | 3 | 23  | 139 | 95   | 17   | 5 | 5   | 137  | 150  | 15   |
| 2 | -11 | 149  | 149  | 13   | 4 | -22 | 153 | 135  | 19   | 5 | 6   | 361  | 348  | 14   |
| 2 | -9  | 291  | 275  | 11   | 4 | -21 | 110 | 107  | 18   | 5 | 7   | 326  | 336  | 13   |
| 2 | -8  | 318  | 295  | 12   | 4 | -20 | 197 | 225  | 18   | 5 | 8   | 357  | 343  | 14   |
| 2 | -6  | 151  | 142  | 11   | 4 | -16 | 350 | 364  | 15   | 5 | 9   | 99   | 121  | 14   |
| 2 | -5  | 951  | 944  | 29   | 4 | -15 | 140 | 133  | 18   | 5 | 10  | 461  | 452  | 16   |
| 2 | -4  | 1739 | 1751 | 53   | 4 | -13 | 271 | 279  | 13   | 5 | 14  | 234  | 259  | 15   |
| 2 | -3  | 932  | 914  | 28   | 4 | -10 | 309 | 326  | 13   | 5 | 15  | 387  | 381  | 16   |
| 2 | -2  | 783  | 795  | 24   | 4 | -9  | 268 | 285  | 12   | 5 | 16  | 116  | 125  | 17   |
| 2 | 0   | 316  | 341  | 11   | 4 | -8  | 350 | 357  | 13   | 5 | 17  | 110  | 87   | 16   |
| 2 | 1   | 303  | 297  | 10   | 4 | -7  | 213 | 204  | 11   | 5 | 18  | 305  | 337  | 16   |
| 2 | 2   | 451  | 447  | 14   | 4 | -6  | 586 | 583  | 19   | 6 | -22 | 217  | 222  | 17   |
| 2 | 3   | 194  | 188  | 9    | 4 | -5  | 225 | 234  | 11   | 6 | -16 | 201  | 192  | 16   |

10|Fo| vs 10|Fc|

page 3

| k | l   | Fo  | Fc  | sigF | k       | l   | Fo    | Fc      | sigF | k | l   | Fo   | Fc   | sigF |
|---|-----|-----|-----|------|---------|-----|-------|---------|------|---|-----|------|------|------|
| 6 | -14 | 240 | 246 | 14   | 9       | -11 | 135   | 156     | 22   | 1 | -3  | 276  | 252  | 10   |
| 6 | -13 | 113 | 47  | 19   | 9       | -6  | 155   | 165     | 21   | 1 | -2  | 620  | 598  | 19   |
| 6 | -12 | 175 | 195 | 16   | 9       | -5  | 115   | 142     | 17   | 1 | -1  | 1182 | 1189 | 36   |
| 6 | -10 | 140 | 169 | 18   | 9       | -2  | 147   | 200     | 20   | 1 | 0   | 777  | 780  | 24   |
| 6 | -9  | 170 | 161 | 14   | 9       | 0   | 140   | 135     | 14   | 1 | 1   | 1284 | 1301 | 39   |
| 6 | -8  | 181 | 185 | 14   | 9       | 4   | 153   | 152     | 17   | 1 | 2   | 806  | 807  | 25   |
| 6 | -5  | 102 | 107 | 14   | 9       | 5   | 171   | 171     | 16   | 1 | 3   | 815  | 828  | 25   |
| 6 | -4  | 749 | 737 | 24   | 9       | 6   | 234   | 215     | 16   | 1 | 4   | 426  | 444  | 14   |
| 6 | -3  | 224 | 223 | 13   | 9       | 7   | 189   | 190     | 17   | 1 | 5   | 325  | 335  | 11   |
| 6 | -2  | 175 | 167 | 13   | 9       | 10  | 129   | 137     | 16   | 1 | 6   | 705  | 693  | 22   |
| 6 | -1  | 201 | 198 | 12   | 9       | 15  | 149   | 157     | 15   | 1 | 7   | 768  | 761  | 24   |
| 6 | 0   | 134 | 137 | 14   | 10      | -4  | 161   | 166     | 15   | 1 | 8   | 587  | 578  | 19   |
| 6 | 1   | 124 | 130 | 15   | 10      | 0   | 116   | 105     | 17   | 1 | 9   | 314  | 321  | 12   |
| 6 | 3   | 144 | 121 | 14   | 10      | 1   | 134   | 141     | 17   | 1 | 10  | 128  | 93   | 12   |
| 6 | 4   | 326 | 317 | 13   | 10      | 2   | 118   | 130     | 17   | 1 | 11  | 209  | 206  | 12   |
| 6 | 7   | 122 | 113 | 12   | 10      | 4   | 132   | 133     | 16   | 1 | 12  | 669  | 657  | 21   |
| 6 | 8   | 477 | 474 | 17   | 10      | 11  | 128   | 128     | 17   | 1 | 13  | 167  | 168  | 14   |
| 6 | 10  | 194 | 224 | 15   |         |     |       |         |      | 1 | 14  | 478  | 464  | 16   |
| 6 | 11  | 272 | 257 | 14   | ^^^^^^^ |     | h = 2 | ^^^^^^^ |      | 1 | 15  | 185  | 180  | 14   |
| 6 | 12  | 125 | 82  | 17   |         |     |       |         |      | 1 | 16  | 282  | 289  | 13   |
| 6 | 14  | 297 | 277 | 14   | 0       | -26 | 313   | 324     | 17   | 1 | 17  | 149  | 130  | 16   |
| 6 | 16  | 303 | 300 | 15   | 0       | -24 | 156   | 105     | 16   | 1 | 19  | 185  | 187  | 15   |
| 6 | 18  | 142 | 130 | 19   | 0       | -20 | 135   | 122     | 12   | 1 | 20  | 154  | 157  | 18   |
| 6 | 20  | 133 | 115 | 15   | 0       | -18 | 493   | 503     | 17   | 1 | 26  | 163  | 143  | 20   |
| 6 | 22  | 119 | 123 | 18   | 0       | -16 | 207   | 216     | 13   | 2 | -24 | 135  | 130  | 21   |
| 7 | -20 | 128 | 80  | 19   | 0       | -14 | 300   | 303     | 12   | 2 | -21 | 146  | 145  | 18   |
| 7 | -18 | 222 | 207 | 16   | 0       | -12 | 438   | 414     | 15   | 2 | -20 | 174  | 171  | 17   |
| 7 | -12 | 170 | 167 | 16   | 0       | -10 | 338   | 350     | 12   | 2 | -19 | 134  | 130  | 13   |
| 7 | -11 | 117 | 98  | 13   | 0       | -8  | 1641  | 1685    | 50   | 2 | -17 | 227  | 229  | 14   |
| 7 | -10 | 127 | 99  | 18   | 0       | -6  | 1148  | 1137    | 35   | 2 | -16 | 374  | 372  | 14   |
| 7 | -9  | 195 | 229 | 16   | 0       | -4  | 273   | 296     | 10   | 2 | -15 | 244  | 253  | 14   |
| 7 | -8  | 277 | 307 | 14   | 0       | -2  | 67    | 85      | 9    | 2 | -14 | 370  | 352  | 14   |
| 7 | -7  | 134 | 138 | 13   | 0       | 0   | 1150  | 1145    | 35   | 2 | -13 | 280  | 288  | 12   |
| 7 | -6  | 282 | 287 | 14   | 0       | 2   | 260   | 254     | 9    | 2 | -12 | 495  | 494  | 17   |
| 7 | -5  | 211 | 207 | 13   | 0       | 4   | 989   | 999     | 30   | 2 | -11 | 742  | 721  | 23   |
| 7 | -2  | 136 | 119 | 16   | 0       | 6   | 498   | 496     | 16   | 2 | -10 | 305  | 317  | 12   |
| 7 | -1  | 339 | 335 | 14   | 0       | 8   | 990   | 966     | 30   | 2 | -9  | 140  | 125  | 12   |
| 7 | 0   | 201 | 200 | 14   | 0       | 10  | 627   | 623     | 20   | 2 | -8  | 141  | 137  | 11   |
| 7 | 1   | 213 | 219 | 14   | 0       | 12  | 360   | 378     | 13   | 2 | -7  | 508  | 505  | 16   |
| 7 | 2   | 156 | 121 | 14   | 0       | 16  | 355   | 356     | 14   | 2 | -6  | 1695 | 1692 | 51   |
| 7 | 5   | 306 | 318 | 14   | 0       | 20  | 115   | 121     | 15   | 2 | -4  | 281  | 276  | 10   |
| 7 | 7   | 277 | 270 | 13   | 0       | 22  | 321   | 336     | 15   | 2 | -3  | 80   | 80   | 11   |
| 7 | 8   | 233 | 232 | 15   | 0       | 26  | 158   | 112     | 20   | 2 | -2  | 911  | 932  | 28   |
| 7 | 10  | 136 | 137 | 18   | 1       | -28 | 166   | 162     | 23   | 2 | -1  | 204  | 184  | 9    |
| 7 | 12  | 227 | 188 | 14   | 1       | -24 | 191   | 203     | 18   | 2 | 0   | 90   | 71   | 12   |
| 7 | 13  | 109 | 107 | 16   | 1       | -22 | 142   | 134     | 18   | 2 | 1   | 89   | 75   | 12   |
| 7 | 18  | 159 | 162 | 22   | 1       | -17 | 99    | 106     | 15   | 2 | 2   | 467  | 448  | 15   |
| 8 | -13 | 209 | 223 | 17   | 1       | -16 | 286   | 304     | 13   | 2 | 3   | 263  | 269  | 10   |
| 8 | -10 | 208 | 190 | 15   | 1       | -15 | 173   | 164     | 13   | 2 | 5   | 562  | 552  | 18   |
| 8 | -9  | 153 | 146 | 19   | 1       | -14 | 121   | 118     | 16   | 2 | 6   | 741  | 758  | 23   |
| 8 | -6  | 228 | 232 | 15   | 1       | -12 | 541   | 534     | 18   | 2 | 7   | 500  | 493  | 16   |
| 8 | -5  | 126 | 127 | 20   | 1       | -11 | 571   | 558     | 18   | 2 | 8   | 360  | 368  | 13   |
| 8 | -2  | 166 | 153 | 15   | 1       | -10 | 656   | 639     | 21   | 2 | 9   | 137  | 122  | 13   |
| 8 | 2   | 296 | 295 | 14   | 1       | -9  | 392   | 363     | 13   | 2 | 10  | 566  | 569  | 18   |
| 8 | 7   | 106 | 109 | 16   | 1       | -8  | 466   | 453     | 15   | 2 | 12  | 322  | 320  | 13   |
| 8 | 10  | 177 | 174 | 17   | 1       | -7  | 807   | 798     | 25   | 2 | 14  | 242  | 234  | 12   |
| 8 | 12  | 112 | 110 | 16   | 1       | -6  | 167   | 186     | 10   | 2 | 16  | 193  | 222  | 15   |
| 8 | 13  | 133 | 91  | 21   | 1       | -5  | 380   | 364     | 13   | 2 | 18  | 361  | 355  | 15   |
| 8 | 14  | 134 | 132 | 22   | 1       | -4  | 893   | 890     | 27   | 2 | 20  | 142  | 152  | 14   |

10|Fo| vs 10|Fc|

page 4

| k | l   | Fo   | Fc   | sigF | k | l   | Fo  | Fc  | sigF | k  | l   | Fo  | Fc  | sigF |
|---|-----|------|------|------|---|-----|-----|-----|------|----|-----|-----|-----|------|
| 3 | -26 | 135  | 83   | 23   | 4 | 8   | 119 | 103 | 15   | 6  | 14  | 111 | 109 | 16   |
| 3 | -22 | 136  | 121  | 21   | 4 | 9   | 446 | 454 | 15   | 6  | 16  | 329 | 315 | 16   |
| 3 | -21 | 102  | 72   | 16   | 4 | 10  | 507 | 505 | 17   | 6  | 20  | 170 | 169 | 18   |
| 3 | -20 | 245  | 254  | 15   | 4 | 12  | 630 | 644 | 21   | 7  | -21 | 136 | 121 | 17   |
| 3 | -19 | 134  | 160  | 20   | 4 | 14  | 225 | 239 | 14   | 7  | -15 | 117 | 129 | 16   |
| 3 | -17 | 129  | 146  | 14   | 4 | 16  | 104 | 101 | 16   | 7  | -11 | 163 | 168 | 17   |
| 3 | -16 | 208  | 216  | 14   | 4 | 18  | 170 | 131 | 15   | 7  | -10 | 221 | 232 | 16   |
| 3 | -15 | 440  | 453  | 16   | 4 | 22  | 173 | 167 | 19   | 7  | -8  | 155 | 161 | 16   |
| 3 | -13 | 220  | 226  | 12   | 5 | -22 | 212 | 200 | 16   | 7  | -7  | 218 | 206 | 13   |
| 3 | -12 | 351  | 338  | 13   | 5 | -21 | 186 | 181 | 17   | 7  | -6  | 308 | 293 | 14   |
| 3 | -10 | 326  | 321  | 13   | 5 | -18 | 148 | 190 | 19   | 7  | -5  | 101 | 123 | 16   |
| 3 | -9  | 465  | 467  | 16   | 5 | -16 | 151 | 133 | 16   | 7  | -4  | 154 | 160 | 15   |
| 3 | -8  | 1212 | 1188 | 37   | 5 | -14 | 255 | 267 | 15   | 7  | -3  | 103 | 137 | 16   |
| 3 | -7  | 351  | 324  | 13   | 5 | -13 | 448 | 460 | 16   | 7  | -2  | 206 | 189 | 14   |
| 3 | -6  | 126  | 146  | 12   | 5 | -12 | 324 | 347 | 14   | 7  | 0   | 153 | 126 | 15   |
| 3 | -5  | 551  | 553  | 18   | 5 | -10 | 477 | 480 | 17   | 7  | 1   | 206 | 183 | 13   |
| 3 | -4  | 818  | 785  | 25   | 5 | -8  | 140 | 129 | 14   | 7  | 2   | 232 | 252 | 14   |
| 3 | -3  | 468  | 434  | 15   | 5 | -7  | 131 | 150 | 15   | 7  | 3   | 191 | 173 | 14   |
| 3 | -2  | 437  | 436  | 14   | 5 | -6  | 242 | 252 | 12   | 7  | 5   | 153 | 137 | 16   |
| 3 | -1  | 460  | 458  | 15   | 5 | -5  | 250 | 260 | 12   | 7  | 6   | 273 | 277 | 14   |
| 3 | 1   | 465  | 448  | 15   | 5 | -4  | 565 | 561 | 18   | 7  | 7   | 96  | 91  | 16   |
| 3 | 2   | 351  | 363  | 12   | 5 | -3  | 103 | 137 | 17   | 7  | 8   | 106 | 105 | 16   |
| 3 | 3   | 670  | 669  | 21   | 5 | 0   | 99  | 110 | 11   | 7  | 11  | 171 | 200 | 17   |
| 3 | 5   | 520  | 497  | 17   | 5 | 2   | 143 | 133 | 12   | 7  | 12  | 110 | 105 | 16   |
| 3 | 6   | 136  | 102  | 12   | 5 | 3   | 244 | 231 | 12   | 7  | 14  | 266 | 239 | 15   |
| 3 | 8   | 291  | 301  | 12   | 5 | 4   | 231 | 230 | 12   | 7  | 19  | 152 | 141 | 20   |
| 3 | 9   | 209  | 204  | 10   | 5 | 5   | 322 | 325 | 13   | 7  | 20  | 144 | 112 | 20   |
| 3 | 10  | 143  | 141  | 13   | 5 | 6   | 383 | 387 | 14   | 8  | -18 | 146 | 127 | 20   |
| 3 | 11  | 199  | 204  | 12   | 5 | 7   | 193 | 195 | 13   | 8  | -12 | 140 | 128 | 14   |
| 3 | 12  | 274  | 289  | 12   | 5 | 8   | 514 | 523 | 18   | 8  | -11 | 184 | 169 | 16   |
| 3 | 14  | 363  | 363  | 14   | 5 | 9   | 346 | 334 | 14   | 8  | -10 | 130 | 162 | 21   |
| 3 | 15  | 170  | 176  | 15   | 5 | 10  | 176 | 176 | 14   | 8  | -8  | 270 | 285 | 14   |
| 3 | 16  | 273  | 285  | 14   | 5 | 12  | 153 | 164 | 15   | 8  | -4  | 267 | 270 | 14   |
| 3 | 17  | 348  | 357  | 15   | 5 | 14  | 385 | 409 | 15   | 8  | -2  | 154 | 157 | 17   |
| 3 | 19  | 196  | 214  | 16   | 5 | 16  | 202 | 177 | 14   | 8  | 0   | 209 | 199 | 14   |
| 4 | -26 | 218  | 212  | 17   | 5 | 17  | 155 | 163 | 19   | 8  | 2   | 227 | 259 | 16   |
| 4 | -20 | 170  | 184  | 17   | 5 | 18  | 174 | 159 | 16   | 8  | 3   | 159 | 173 | 18   |
| 4 | -18 | 258  | 264  | 15   | 6 | -24 | 148 | 136 | 15   | 8  | 4   | 264 | 245 | 14   |
| 4 | -16 | 500  | 507  | 18   | 6 | -21 | 120 | 125 | 17   | 8  | 7   | 117 | 82  | 19   |
| 4 | -15 | 298  | 316  | 14   | 6 | -17 | 153 | 167 | 20   | 8  | 10  | 102 | 108 | 17   |
| 4 | -14 | 454  | 480  | 16   | 6 | -14 | 208 | 190 | 16   | 8  | 12  | 192 | 196 | 16   |
| 4 | -12 | 133  | 149  | 15   | 6 | -13 | 105 | 134 | 17   | 8  | 18  | 133 | 132 | 22   |
| 4 | -11 | 347  | 356  | 14   | 6 | -12 | 220 | 226 | 14   | 9  | -13 | 130 | 148 | 22   |
| 4 | -10 | 197  | 197  | 12   | 6 | -10 | 266 | 267 | 14   | 9  | -4  | 146 | 126 | 19   |
| 4 | -9  | 157  | 159  | 13   | 6 | -9  | 109 | 98  | 13   | 9  | -3  | 134 | 124 | 14   |
| 4 | -8  | 491  | 508  | 16   | 6 | -8  | 241 | 225 | 13   | 9  | 1   | 143 | 147 | 20   |
| 4 | -6  | 840  | 824  | 26   | 6 | -6  | 233 | 248 | 13   | 9  | 8   | 152 | 142 | 19   |
| 4 | -5  | 486  | 469  | 16   | 6 | -4  | 192 | 187 | 12   | 9  | 9   | 145 | 131 | 19   |
| 4 | -4  | 94   | 93   | 11   | 6 | -3  | 206 | 200 | 13   | 10 | -10 | 111 | 92  | 17   |
| 4 | -2  | 388  | 365  | 13   | 6 | -2  | 650 | 633 | 21   | 10 | -2  | 209 | 245 | 19   |
| 4 | -1  | 493  | 508  | 16   | 6 | -1  | 175 | 183 | 14   | 10 | -1  | 125 | 38  | 20   |
| 4 | 0   | 550  | 569  | 18   | 6 | 1   | 136 | 139 | 14   | 10 | 0   | 185 | 164 | 17   |
| 4 | 1   | 116  | 123  | 13   | 6 | 3   | 89  | 69  | 13   | 10 | 4   | 147 | 128 | 19   |
| 4 | 2   | 153  | 146  | 12   | 6 | 4   | 117 | 127 | 18   | 10 | 5   | 114 | 113 | 19   |
| 4 | 3   | 134  | 151  | 12   | 6 | 6   | 263 | 252 | 13   | 10 | 6   | 155 | 176 | 21   |
| 4 | 4   | 234  | 256  | 11   | 6 | 7   | 307 | 319 | 14   | 10 | 8   | 155 | 149 | 21   |
| 4 | 5   | 449  | 447  | 15   | 6 | 8   | 491 | 490 | 17   |    |     |     |     |      |
| 4 | 6   | 173  | 153  | 11   | 6 | 9   | 245 | 265 | 14   |    |     |     |     |      |
| 4 | 7   | 282  | 263  | 12   | 6 | 10  | 382 | 383 | 15   |    |     |     |     |      |

^^^^^^ h = 3 ^^^^^^^

10|Fo| vs 10|Fc|

page 5

| k | l   | Fo   | Fc   | sigF | k | l   | Fo  | Fc  | sigF | k | l   | Fo  | Fc  | sigF |
|---|-----|------|------|------|---|-----|-----|-----|------|---|-----|-----|-----|------|
| 0 | -28 | 149  | 126  | 22   | 1 | 26  | 141 | 106 | 19   | 3 | 12  | 366 | 378 | 14   |
| 0 | -24 | 197  | 195  | 18   | 2 | -22 | 209 | 209 | 16   | 3 | 13  | 326 | 324 | 14   |
| 0 | -18 | 546  | 540  | 19   | 2 | -19 | 157 | 150 | 17   | 3 | 14  | 152 | 147 | 15   |
| 0 | -16 | 460  | 465  | 16   | 2 | -18 | 222 | 231 | 15   | 3 | 15  | 106 | 79  | 13   |
| 0 | -14 | 528  | 515  | 18   | 2 | -15 | 308 | 302 | 13   | 3 | 16  | 271 | 250 | 14   |
| 0 | -12 | 555  | 563  | 18   | 2 | -14 | 204 | 224 | 13   | 3 | 19  | 174 | 184 | 16   |
| 0 | -10 | 443  | 418  | 15   | 2 | -12 | 286 | 311 | 12   | 3 | 21  | 131 | 145 | 21   |
| 0 | -8  | 443  | 464  | 15   | 2 | -11 | 243 | 244 | 12   | 3 | 22  | 167 | 122 | 17   |
| 0 | -6  | 1185 | 1211 | 36   | 2 | -10 | 649 | 645 | 21   | 3 | 25  | 135 | 71  | 19   |
| 0 | -4  | 302  | 282  | 11   | 2 | -9  | 109 | 102 | 14   | 4 | -24 | 157 | 145 | 19   |
| 0 | -2  | 541  | 544  | 17   | 2 | -7  | 489 | 472 | 16   | 4 | -20 | 117 | 119 | 15   |
| 0 | 0   | 227  | 225  | 9    | 2 | -6  | 204 | 214 | 11   | 4 | -16 | 312 | 320 | 14   |
| 0 | 2   | 407  | 421  | 13   | 2 | -4  | 965 | 957 | 29   | 4 | -15 | 122 | 87  | 18   |
| 0 | 4   | 258  | 271  | 10   | 2 | -3  | 168 | 158 | 10   | 4 | -14 | 273 | 266 | 14   |
| 0 | 6   | 1212 | 1193 | 37   | 2 | -2  | 166 | 156 | 10   | 4 | -13 | 129 | 128 | 17   |
| 0 | 8   | 793  | 788  | 25   | 2 | -1  | 336 | 328 | 12   | 4 | -11 | 140 | 146 | 15   |
| 0 | 10  | 282  | 255  | 11   | 2 | 0   | 497 | 528 | 16   | 4 | -10 | 241 | 240 | 12   |
| 0 | 12  | 351  | 347  | 13   | 2 | 1   | 440 | 423 | 14   | 4 | -9  | 175 | 165 | 12   |
| 0 | 14  | 406  | 420  | 15   | 2 | 2   | 359 | 361 | 12   | 4 | -6  | 569 | 581 | 18   |
| 0 | 20  | 133  | 156  | 22   | 2 | 4   | 292 | 280 | 11   | 4 | -4  | 268 | 288 | 12   |
| 0 | 24  | 336  | 337  | 16   | 2 | 5   | 488 | 460 | 16   | 4 | -3  | 273 | 290 | 11   |
| 1 | -25 | 207  | 180  | 16   | 2 | 6   | 965 | 952 | 30   | 4 | -2  | 191 | 202 | 11   |
| 1 | -21 | 119  | 124  | 15   | 2 | 7   | 605 | 578 | 19   | 4 | -1  | 104 | 81  | 13   |
| 1 | -20 | 235  | 231  | 14   | 2 | 8   | 750 | 749 | 23   | 4 | 0   | 116 | 104 | 14   |
| 1 | -19 | 175  | 203  | 17   | 2 | 9   | 470 | 433 | 16   | 4 | 1   | 726 | 729 | 23   |
| 1 | -17 | 118  | 107  | 19   | 2 | 10  | 301 | 286 | 12   | 4 | 2   | 520 | 521 | 17   |
| 1 | -16 | 202  | 197  | 14   | 2 | 12  | 264 | 252 | 12   | 4 | 3   | 268 | 248 | 11   |
| 1 | -15 | 227  | 203  | 12   | 2 | 13  | 163 | 162 | 13   | 4 | 4   | 264 | 258 | 12   |
| 1 | -14 | 564  | 589  | 19   | 2 | 16  | 309 | 328 | 14   | 4 | 5   | 99  | 86  | 16   |
| 1 | -13 | 227  | 247  | 13   | 2 | 18  | 348 | 346 | 15   | 4 | 10  | 397 | 391 | 15   |
| 1 | -12 | 98   | 91   | 16   | 2 | 20  | 133 | 158 | 15   | 4 | 11  | 102 | 108 | 14   |
| 1 | -11 | 564  | 565  | 18   | 2 | 26  | 153 | 155 | 23   | 4 | 12  | 308 | 316 | 14   |
| 1 | -9  | 693  | 702  | 22   | 3 | -26 | 128 | 123 | 17   | 4 | 13  | 177 | 175 | 14   |
| 1 | -8  | 605  | 616  | 19   | 3 | -25 | 155 | 154 | 20   | 4 | 14  | 491 | 490 | 17   |
| 1 | -7  | 923  | 916  | 28   | 3 | -21 | 132 | 138 | 22   | 4 | 16  | 328 | 329 | 14   |
| 1 | -5  | 115  | 124  | 12   | 3 | -18 | 238 | 254 | 16   | 4 | 20  | 118 | 122 | 18   |
| 1 | -3  | 382  | 390  | 13   | 3 | -17 | 236 | 245 | 15   | 4 | 21  | 165 | 156 | 18   |
| 1 | -2  | 114  | 120  | 12   | 3 | -16 | 238 | 248 | 14   | 4 | 22  | 121 | 122 | 17   |
| 1 | -1  | 146  | 155  | 10   | 3 | -15 | 127 | 129 | 13   | 4 | 24  | 169 | 185 | 21   |
| 1 | 0   | 144  | 148  | 10   | 3 | -14 | 186 | 196 | 13   | 5 | -20 | 356 | 334 | 16   |
| 1 | 1   | 264  | 269  | 10   | 3 | -12 | 370 | 370 | 14   | 5 | -19 | 146 | 156 | 20   |
| 1 | 2   | 538  | 543  | 17   | 3 | -11 | 342 | 354 | 13   | 5 | -16 | 227 | 253 | 15   |
| 1 | 3   | 233  | 255  | 10   | 3 | -9  | 304 | 292 | 12   | 5 | -15 | 125 | 116 | 20   |
| 1 | 4   | 946  | 964  | 29   | 3 | -8  | 812 | 824 | 25   | 5 | -14 | 201 | 187 | 15   |
| 1 | 6   | 309  | 321  | 11   | 3 | -7  | 124 | 129 | 14   | 5 | -11 | 211 | 188 | 13   |
| 1 | 8   | 799  | 785  | 25   | 3 | -6  | 489 | 465 | 16   | 5 | -10 | 272 | 272 | 13   |
| 1 | 9   | 497  | 492  | 16   | 3 | -5  | 176 | 184 | 11   | 5 | -9  | 161 | 149 | 14   |
| 1 | 10  | 587  | 583  | 19   | 3 | -4  | 362 | 352 | 13   | 5 | -8  | 264 | 268 | 13   |
| 1 | 11  | 125  | 118  | 13   | 3 | -3  | 526 | 522 | 17   | 5 | -6  | 377 | 396 | 14   |
| 1 | 12  | 410  | 424  | 14   | 3 | -2  | 539 | 529 | 17   | 5 | -4  | 294 | 286 | 12   |
| 1 | 13  | 133  | 133  | 15   | 3 | -1  | 209 | 200 | 10   | 5 | -3  | 112 | 134 | 17   |
| 1 | 14  | 84   | 16   | 14   | 3 | 0   | 300 | 312 | 11   | 5 | -2  | 417 | 426 | 15   |
| 1 | 15  | 180  | 182  | 14   | 3 | 2   | 205 | 214 | 11   | 5 | -1  | 433 | 440 | 15   |
| 1 | 16  | 202  | 184  | 13   | 3 | 4   | 276 | 283 | 11   | 5 | 4   | 333 | 347 | 13   |
| 1 | 18  | 108  | 134  | 17   | 3 | 5   | 404 | 418 | 14   | 5 | 5   | 303 | 312 | 13   |
| 1 | 20  | 108  | 102  | 16   | 3 | 6   | 197 | 225 | 11   | 5 | 7   | 287 | 278 | 13   |
| 1 | 21  | 183  | 168  | 16   | 3 | 9   | 473 | 460 | 16   | 5 | 8   | 93  | 102 | 15   |
| 1 | 22  | 212  | 204  | 16   | 3 | 10  | 313 | 308 | 13   | 5 | 10  | 379 | 385 | 15   |
| 1 | 23  | 140  | 163  | 22   | 3 | 11  | 157 | 171 | 15   | 5 | 11  | 229 | 238 | 14   |

10|Fo| vs 10|Fc|

page 6

| k | l   | Fo  | Fc  | sigF | k       | l   | Fo  | Fc      | sigF | k | l   | Fo  | Fc  | sigF |
|---|-----|-----|-----|------|---------|-----|-----|---------|------|---|-----|-----|-----|------|
| 5 | 13  | 349 | 350 | 14   | 9       | -12 | 115 | 129     | 19   | 1 | 8   | 251 | 258 | 11   |
| 5 | 14  | 237 | 244 | 14   | 9       | -10 | 130 | 130     | 17   | 1 | 10  | 298 | 300 | 12   |
| 5 | 16  | 161 | 202 | 19   | 9       | -8  | 157 | 143     | 19   | 1 | 11  | 186 | 171 | 12   |
| 5 | 19  | 197 | 169 | 15   | 9       | -7  | 157 | 159     | 17   | 1 | 12  | 413 | 401 | 15   |
| 5 | 20  | 139 | 112 | 21   | 9       | -1  | 297 | 304     | 15   | 1 | 13  | 134 | 144 | 17   |
| 6 | -22 | 145 | 154 | 23   | 9       | 0   | 125 | 139     | 21   | 1 | 14  | 202 | 202 | 13   |
| 6 | -20 | 141 | 113 | 19   | 9       | 1   | 132 | 100     | 19   | 1 | 15  | 114 | 103 | 18   |
| 6 | -18 | 171 | 169 | 18   | 9       | 4   | 177 | 190     | 19   | 1 | 17  | 168 | 152 | 15   |
| 6 | -12 | 304 | 316 | 15   | 9       | 7   | 160 | 144     | 17   | 1 | 18  | 246 | 241 | 15   |
| 6 | -10 | 199 | 194 | 15   | 10      | -3  | 126 | 148     | 18   | 1 | 20  | 162 | 133 | 16   |
| 6 | -8  | 187 | 194 | 14   | 10      | -2  | 149 | 104     | 19   | 1 | 22  | 137 | 140 | 20   |
| 6 | -6  | 197 | 169 | 13   | 10      | 0   | 116 | 101     | 16   | 1 | 24  | 139 | 99  | 22   |
| 6 | -5  | 101 | 104 | 14   | 10      | 3   | 141 | 118     | 20   | 2 | -28 | 157 | 170 | 24   |
| 6 | -4  | 442 | 465 | 16   | 10      | 6   | 125 | 120     | 18   | 2 | -24 | 117 | 113 | 17   |
| 6 | -2  | 280 | 286 | 13   | 10      | 8   | 157 | 144     | 21   | 2 | -22 | 130 | 133 | 15   |
| 6 | 0   | 541 | 548 | 18   |         |     |     |         |      | 2 | -20 | 348 | 340 | 15   |
| 6 | 1   | 157 | 145 | 14   | ^^^^^^^ | h = | 4   | ^^^^^^^ |      | 2 | -18 | 162 | 177 | 16   |
| 6 | 5   | 318 | 328 | 14   |         |     |     |         |      | 2 | -17 | 212 | 226 | 15   |
| 6 | 6   | 144 | 171 | 18   | 0       | -26 | 144 | 128     | 22   | 2 | -16 | 139 | 135 | 16   |
| 6 | 8   | 371 | 367 | 15   | 0       | -22 | 164 | 170     | 19   | 2 | -14 | 294 | 288 | 13   |
| 6 | 10  | 187 | 181 | 14   | 0       | -16 | 451 | 452     | 16   | 2 | -12 | 296 | 303 | 13   |
| 6 | 11  | 128 | 119 | 17   | 0       | -14 | 109 | 110     | 18   | 2 | -10 | 395 | 398 | 14   |
| 6 | 12  | 141 | 142 | 19   | 0       | -8  | 551 | 559     | 18   | 2 | -9  | 139 | 126 | 13   |
| 6 | 14  | 172 | 157 | 16   | 0       | -4  | 522 | 519     | 17   | 2 | -8  | 667 | 646 | 21   |
| 6 | 18  | 204 | 206 | 17   | 0       | -2  | 547 | 529     | 17   | 2 | -7  | 267 | 245 | 11   |
| 7 | -17 | 177 | 161 | 17   | 0       | 0   | 258 | 240     | 10   | 2 | -5  | 88  | 87  | 11   |
| 7 | -14 | 155 | 147 | 19   | 0       | 2   | 184 | 186     | 10   | 2 | -4  | 157 | 173 | 11   |
| 7 | -11 | 112 | 110 | 16   | 0       | 4   | 700 | 723     | 22   | 2 | -3  | 298 | 287 | 11   |
| 7 | -10 | 159 | 170 | 16   | 0       | 8   | 936 | 934     | 29   | 2 | -2  | 468 | 488 | 15   |
| 7 | -8  | 298 | 318 | 15   | 0       | 12  | 319 | 332     | 13   | 2 | -1  | 460 | 465 | 15   |
| 7 | -5  | 195 | 188 | 14   | 0       | 14  | 458 | 453     | 16   | 2 | 0   | 97  | 117 | 16   |
| 7 | -4  | 135 | 121 | 16   | 0       | 16  | 266 | 242     | 13   | 2 | 1   | 140 | 177 | 12   |
| 7 | -3  | 128 | 117 | 17   | 0       | 20  | 188 | 154     | 15   | 2 | 2   | 463 | 489 | 15   |
| 7 | -2  | 145 | 174 | 15   | 0       | 22  | 262 | 271     | 17   | 2 | 3   | 544 | 509 | 17   |
| 7 | -1  | 146 | 153 | 15   | 0       | 24  | 121 | 62      | 20   | 2 | 5   | 130 | 104 | 13   |
| 7 | 0   | 178 | 191 | 16   | 1       | -23 | 144 | 150     | 22   | 2 | 6   | 381 | 377 | 13   |
| 7 | 1   | 153 | 158 | 15   | 1       | -22 | 168 | 149     | 16   | 2 | 7   | 213 | 191 | 11   |
| 7 | 2   | 303 | 305 | 14   | 1       | -21 | 160 | 154     | 17   | 2 | 8   | 218 | 239 | 11   |
| 7 | 3   | 377 | 383 | 15   | 1       | -20 | 149 | 148     | 19   | 2 | 10  | 683 | 703 | 22   |
| 7 | 4   | 375 | 360 | 15   | 1       | -19 | 145 | 143     | 18   | 2 | 11  | 111 | 105 | 13   |
| 7 | 5   | 145 | 137 | 17   | 1       | -18 | 406 | 410     | 16   | 2 | 12  | 143 | 147 | 14   |
| 7 | 8   | 120 | 145 | 20   | 1       | -14 | 130 | 127     | 16   | 2 | 13  | 157 | 141 | 15   |
| 7 | 10  | 150 | 117 | 17   | 1       | -13 | 403 | 403     | 15   | 2 | 16  | 134 | 135 | 13   |
| 7 | 12  | 218 | 207 | 14   | 1       | -12 | 464 | 497     | 16   | 2 | 18  | 309 | 316 | 14   |
| 7 | 14  | 166 | 158 | 17   | 1       | -10 | 543 | 533     | 18   | 2 | 20  | 351 | 340 | 16   |
| 7 | 16  | 245 | 248 | 16   | 1       | -9  | 488 | 484     | 16   | 3 | -24 | 135 | 100 | 21   |
| 8 | -10 | 170 | 161 | 16   | 1       | -8  | 247 | 236     | 11   | 3 | -23 | 165 | 203 | 21   |
| 8 | -9  | 138 | 131 | 14   | 1       | -7  | 608 | 578     | 19   | 3 | -18 | 121 | 109 | 20   |
| 8 | -8  | 137 | 76  | 17   | 1       | -6  | 569 | 549     | 18   | 3 | -17 | 105 | 126 | 17   |
| 8 | -6  | 392 | 387 | 16   | 1       | -5  | 470 | 468     | 15   | 3 | -16 | 273 | 267 | 14   |
| 8 | -1  | 147 | 156 | 18   | 1       | -3  | 138 | 157     | 11   | 3 | -15 | 311 | 315 | 14   |
| 8 | 0   | 118 | 93  | 19   | 1       | -2  | 385 | 398     | 13   | 3 | -14 | 363 | 355 | 14   |
| 8 | 2   | 321 | 316 | 15   | 1       | -1  | 178 | 205     | 10   | 3 | -13 | 250 | 246 | 12   |
| 8 | 3   | 116 | 128 | 16   | 1       | 1   | 363 | 387     | 12   | 3 | -12 | 261 | 262 | 12   |
| 8 | 4   | 104 | 110 | 17   | 1       | 2   | 458 | 455     | 15   | 3 | -11 | 159 | 159 | 14   |
| 8 | 6   | 321 | 334 | 16   | 1       | 3   | 214 | 220     | 10   | 3 | -10 | 270 | 282 | 12   |
| 8 | 7   | 108 | 113 | 18   | 1       | 4   | 413 | 407     | 14   | 3 | -7  | 280 | 275 | 12   |
| 8 | 10  | 180 | 177 | 16   | 1       | 6   | 795 | 794     | 25   | 3 | -6  | 450 | 447 | 15   |
| 8 | 14  | 198 | 178 | 16   | 1       | 7   | 105 | 111     | 15   | 3 | -5  | 260 | 277 | 11   |

10|Fo| vs 10|Fc|

page 7

| k | l   | Fo  | Fc  | sigF | k | l   | Fo  | Fc  | sigF | k      | l   | Fo  | Fc     | sigF |
|---|-----|-----|-----|------|---|-----|-----|-----|------|--------|-----|-----|--------|------|
| 3 | -4  | 412 | 409 | 14   | 5 | -2  | 196 | 206 | 13   | 8      | -18 | 110 | 118    | 18   |
| 3 | -3  | 94  | 56  | 14   | 5 | -1  | 109 | 116 | 16   | 8      | -14 | 146 | 171    | 21   |
| 3 | 0   | 968 | 953 | 30   | 5 | 0   | 334 | 354 | 13   | 8      | -8  | 285 | 289    | 15   |
| 3 | 1   | 295 | 291 | 12   | 5 | 1   | 368 | 364 | 14   | 8      | -7  | 165 | 194    | 20   |
| 3 | 2   | 212 | 217 | 11   | 5 | 2   | 173 | 148 | 12   | 8      | -6  | 230 | 257    | 16   |
| 3 | 3   | 240 | 260 | 11   | 5 | 6   | 255 | 245 | 13   | 8      | -5  | 121 | 87     | 18   |
| 3 | 4   | 310 | 306 | 12   | 5 | 7   | 173 | 164 | 14   | 8      | -4  | 266 | 282    | 15   |
| 3 | 5   | 309 | 302 | 12   | 5 | 8   | 216 | 205 | 13   | 8      | -3  | 117 | 52     | 18   |
| 3 | 6   | 227 | 240 | 11   | 5 | 9   | 304 | 296 | 13   | 8      | -2  | 108 | 106    | 17   |
| 3 | 7   | 509 | 522 | 17   | 5 | 10  | 152 | 131 | 15   | 8      | -1  | 159 | 148    | 18   |
| 3 | 8   | 464 | 473 | 16   | 5 | 11  | 213 | 188 | 14   | 8      | 1   | 145 | 194    | 22   |
| 3 | 9   | 137 | 159 | 15   | 5 | 12  | 335 | 353 | 15   | 8      | 3   | 116 | 108    | 19   |
| 3 | 12  | 352 | 346 | 14   | 5 | 15  | 144 | 125 | 16   | 8      | 4   | 155 | 164    | 19   |
| 3 | 13  | 120 | 130 | 18   | 5 | 16  | 126 | 117 | 15   | 8      | 10  | 162 | 146    | 19   |
| 3 | 14  | 239 | 235 | 14   | 5 | 17  | 187 | 182 | 17   | 8      | 12  | 187 | 177    | 16   |
| 3 | 15  | 275 | 276 | 14   | 5 | 19  | 104 | 65  | 17   | 9      | -12 | 171 | 141    | 19   |
| 3 | 18  | 153 | 143 | 18   | 5 | 22  | 126 | 116 | 17   | 9      | -10 | 148 | 168    | 16   |
| 3 | 20  | 152 | 153 | 18   | 6 | -20 | 219 | 191 | 16   | 9      | -9  | 155 | 175    | 15   |
| 3 | 24  | 240 | 216 | 16   | 6 | -18 | 134 | 140 | 21   | 9      | -1  | 140 | 148    | 21   |
| 4 | -26 | 151 | 134 | 16   | 6 | -16 | 118 | 122 | 16   | 9      | 0   | 234 | 233    | 15   |
| 4 | -18 | 162 | 162 | 16   | 6 | -15 | 143 | 127 | 18   | 9      | 1   | 108 | 110    | 18   |
| 4 | -16 | 110 | 120 | 16   | 6 | -12 | 110 | 103 | 16   | 9      | 11  | 174 | 170    | 19   |
| 4 | -14 | 389 | 394 | 15   | 6 | -10 | 519 | 523 | 18   | 9      | 12  | 214 | 221    | 18   |
| 4 | -12 | 171 | 164 | 14   | 6 | -8  | 103 | 68  | 17   |        |     |     |        |      |
| 4 | -10 | 208 | 221 | 13   | 6 | -7  | 129 | 160 | 19   | ^^^^^^ | h = | 5   | ^^^^^^ |      |
| 4 | -8  | 408 | 396 | 14   | 6 | -5  | 115 | 100 | 14   |        |     |     |        |      |
| 4 | -6  | 121 | 96  | 14   | 6 | -3  | 243 | 244 | 13   | 0      | -24 | 188 | 193    | 18   |
| 4 | -5  | 148 | 135 | 13   | 6 | -2  | 448 | 471 | 16   | 0      | -22 | 134 | 130    | 19   |
| 4 | -4  | 319 | 335 | 13   | 6 | -1  | 101 | 89  | 14   | 0      | -20 | 133 | 127    | 19   |
| 4 | -3  | 331 | 322 | 13   | 6 | 2   | 434 | 436 | 16   | 0      | -16 | 295 | 273    | 14   |
| 4 | -2  | 242 | 252 | 12   | 6 | 3   | 200 | 198 | 14   | 0      | -14 | 381 | 378    | 14   |
| 4 | 0   | 148 | 151 | 13   | 6 | 7   | 188 | 203 | 15   | 0      | -12 | 519 | 506    | 17   |
| 4 | 1   | 174 | 181 | 12   | 6 | 8   | 183 | 162 | 14   | 0      | -10 | 130 | 131    | 13   |
| 4 | 2   | 343 | 335 | 13   | 6 | 9   | 272 | 289 | 14   | 0      | -6  | 608 | 597    | 19   |
| 4 | 3   | 105 | 95  | 16   | 6 | 10  | 367 | 372 | 15   | 0      | -4  | 405 | 392    | 14   |
| 4 | 4   | 742 | 761 | 23   | 6 | 16  | 136 | 131 | 21   | 0      | -2  | 633 | 633    | 20   |
| 4 | 6   | 436 | 416 | 15   | 6 | 17  | 156 | 135 | 19   | 0      | 0   | 392 | 358    | 13   |
| 4 | 7   | 343 | 339 | 13   | 6 | 20  | 164 | 153 | 15   | 0      | 2   | 421 | 375    | 14   |
| 4 | 8   | 274 | 282 | 13   | 7 | -16 | 167 | 121 | 18   | 0      | 4   | 341 | 340    | 13   |
| 4 | 10  | 164 | 174 | 15   | 7 | -14 | 123 | 96  | 19   | 0      | 6   | 764 | 752    | 24   |
| 4 | 11  | 219 | 231 | 13   | 7 | -13 | 143 | 132 | 18   | 0      | 10  | 391 | 387    | 14   |
| 4 | 12  | 240 | 227 | 13   | 7 | -12 | 238 | 234 | 15   | 0      | 12  | 424 | 411    | 15   |
| 4 | 13  | 136 | 131 | 16   | 7 | -10 | 193 | 176 | 15   | 0      | 14  | 177 | 184    | 14   |
| 4 | 14  | 337 | 339 | 15   | 7 | -9  | 131 | 138 | 20   | 0      | 16  | 469 | 468    | 17   |
| 4 | 16  | 205 | 184 | 14   | 7 | -7  | 166 | 165 | 16   | 0      | 20  | 150 | 145    | 15   |
| 4 | 18  | 169 | 164 | 17   | 7 | -6  | 118 | 126 | 14   | 0      | 24  | 225 | 217    | 16   |
| 4 | 19  | 140 | 102 | 14   | 7 | -5  | 119 | 104 | 19   | 1      | -22 | 188 | 185    | 18   |
| 4 | 22  | 244 | 230 | 16   | 7 | -4  | 163 | 167 | 17   | 1      | -19 | 250 | 237    | 15   |
| 5 | -21 | 143 | 137 | 22   | 7 | -3  | 253 | 262 | 14   | 1      | -18 | 189 | 203    | 15   |
| 5 | -17 | 124 | 140 | 15   | 7 | -1  | 121 | 95  | 14   | 1      | -17 | 122 | 115    | 13   |
| 5 | -15 | 151 | 167 | 19   | 7 | 0   | 320 | 317 | 14   | 1      | -16 | 298 | 302    | 14   |
| 5 | -12 | 319 | 329 | 14   | 7 | 1   | 225 | 217 | 13   | 1      | -14 | 159 | 182    | 14   |
| 5 | -10 | 109 | 72  | 18   | 7 | 2   | 134 | 139 | 20   | 1      | -12 | 93  | 32     | 12   |
| 5 | -9  | 175 | 174 | 13   | 7 | 5   | 275 | 276 | 15   | 1      | -11 | 228 | 237    | 12   |
| 5 | -8  | 249 | 239 | 13   | 7 | 9   | 104 | 79  | 16   | 1      | -10 | 353 | 351    | 13   |
| 5 | -7  | 141 | 125 | 14   | 7 | 11  | 162 | 152 | 17   | 1      | -8  | 708 | 705    | 22   |
| 5 | -5  | 273 | 270 | 12   | 7 | 12  | 134 | 132 | 21   | 1      | -6  | 119 | 112    | 13   |
| 5 | -4  | 164 | 168 | 14   | 7 | 14  | 130 | 172 | 22   | 1      | -5  | 131 | 148    | 12   |
| 5 | -3  | 170 | 157 | 12   | 7 | 15  | 198 | 186 | 17   | 1      | -4  | 167 | 187    | 11   |



10|Fo| vs 10|Fc|

page 8

| k | l   | Fo  | Fc  | sigF | k | l   | Fo  | Fc  | sigF | k | l   | Fo  | Fc  | sigF |
|---|-----|-----|-----|------|---|-----|-----|-----|------|---|-----|-----|-----|------|
| 1 | -3  | 566 | 533 | 18   | 3 | -3  | 201 | 204 | 11   | 5 | 2   | 429 | 447 | 15   |
| 1 | -2  | 261 | 239 | 11   | 3 | -2  | 533 | 542 | 17   | 5 | 3   | 253 | 294 | 13   |
| 1 | -1  | 607 | 580 | 19   | 3 | -1  | 249 | 235 | 12   | 5 | 4   | 266 | 250 | 13   |
| 1 | 0   | 357 | 347 | 13   | 3 | 0   | 285 | 296 | 12   | 5 | 6   | 93  | 116 | 15   |
| 1 | 1   | 683 | 657 | 21   | 3 | 1   | 408 | 413 | 14   | 5 | 10  | 354 | 316 | 15   |
| 1 | 3   | 177 | 192 | 11   | 3 | 2   | 741 | 757 | 23   | 5 | 11  | 321 | 326 | 15   |
| 1 | 4   | 422 | 427 | 14   | 3 | 3   | 107 | 95  | 16   | 5 | 12  | 124 | 110 | 19   |
| 1 | 8   | 617 | 608 | 20   | 3 | 4   | 287 | 300 | 12   | 5 | 13  | 108 | 95  | 15   |
| 1 | 9   | 174 | 165 | 13   | 3 | 5   | 427 | 434 | 15   | 5 | 14  | 117 | 150 | 17   |
| 1 | 10  | 256 | 260 | 12   | 3 | 6   | 94  | 91  | 14   | 5 | 19  | 155 | 146 | 20   |
| 1 | 11  | 129 | 137 | 17   | 3 | 7   | 270 | 249 | 12   | 5 | 20  | 144 | 107 | 22   |
| 1 | 12  | 199 | 185 | 13   | 3 | 8   | 499 | 501 | 17   | 6 | -18 | 136 | 155 | 21   |
| 1 | 14  | 146 | 139 | 17   | 3 | 9   | 373 | 366 | 14   | 6 | -12 | 114 | 104 | 15   |
| 1 | 17  | 139 | 144 | 19   | 3 | 10  | 199 | 212 | 14   | 6 | -9  | 188 | 182 | 15   |
| 1 | 19  | 210 | 224 | 17   | 3 | 11  | 287 | 299 | 14   | 6 | -8  | 319 | 303 | 14   |
| 1 | 20  | 121 | 123 | 17   | 3 | 13  | 128 | 143 | 19   | 6 | -5  | 283 | 314 | 14   |
| 1 | 21  | 131 | 122 | 15   | 3 | 14  | 282 | 273 | 14   | 6 | -3  | 186 | 181 | 15   |
| 2 | -22 | 135 | 129 | 22   | 3 | 16  | 325 | 348 | 15   | 6 | 0   | 326 | 325 | 14   |
| 2 | -20 | 188 | 201 | 17   | 3 | 17  | 251 | 239 | 15   | 6 | 1   | 330 | 350 | 14   |
| 2 | -18 | 332 | 338 | 15   | 3 | 19  | 111 | 84  | 17   | 6 | 2   | 268 | 270 | 14   |
| 2 | -16 | 234 | 238 | 14   | 3 | 20  | 258 | 277 | 17   | 6 | 4   | 160 | 142 | 14   |
| 2 | -15 | 266 | 270 | 13   | 4 | -24 | 146 | 162 | 17   | 6 | 5   | 309 | 339 | 14   |
| 2 | -12 | 423 | 426 | 15   | 4 | -16 | 212 | 231 | 15   | 6 | 7   | 114 | 96  | 13   |
| 2 | -11 | 109 | 128 | 17   | 4 | -14 | 264 | 278 | 14   | 6 | 8   | 268 | 261 | 15   |
| 2 | -10 | 281 | 293 | 12   | 4 | -12 | 271 | 273 | 14   | 6 | 9   | 117 | 153 | 17   |
| 2 | -9  | 149 | 139 | 14   | 4 | -10 | 187 | 157 | 12   | 6 | 12  | 169 | 163 | 17   |
| 2 | -8  | 448 | 472 | 15   | 4 | -9  | 89  | 78  | 14   | 6 | 15  | 127 | 123 | 15   |
| 2 | -6  | 385 | 370 | 14   | 4 | -6  | 533 | 539 | 18   | 6 | 18  | 172 | 116 | 17   |
| 2 | -5  | 171 | 157 | 12   | 4 | -4  | 238 | 216 | 12   | 7 | -14 | 146 | 170 | 21   |
| 2 | -4  | 129 | 142 | 13   | 4 | -3  | 127 | 128 | 15   | 7 | -13 | 168 | 189 | 18   |
| 2 | -3  | 255 | 242 | 11   | 4 | -2  | 353 | 342 | 13   | 7 | -10 | 115 | 112 | 16   |
| 2 | -1  | 451 | 438 | 15   | 4 | -1  | 118 | 119 | 15   | 7 | -7  | 162 | 155 | 16   |
| 2 | 0   | 395 | 424 | 14   | 4 | 0   | 362 | 360 | 14   | 7 | -5  | 331 | 315 | 15   |
| 2 | 1   | 184 | 184 | 11   | 4 | 1   | 107 | 126 | 17   | 7 | -4  | 185 | 185 | 17   |
| 2 | 3   | 142 | 140 | 12   | 4 | 2   | 270 | 255 | 12   | 7 | -3  | 193 | 199 | 15   |
| 2 | 4   | 617 | 640 | 20   | 4 | 4   | 228 | 230 | 13   | 7 | -2  | 189 | 174 | 15   |
| 2 | 6   | 386 | 375 | 14   | 4 | 5   | 391 | 402 | 14   | 7 | 0   | 133 | 131 | 17   |
| 2 | 7   | 409 | 423 | 15   | 4 | 6   | 733 | 753 | 23   | 7 | 3   | 299 | 304 | 14   |
| 2 | 8   | 524 | 529 | 18   | 4 | 7   | 189 | 166 | 13   | 7 | 5   | 138 | 139 | 18   |
| 2 | 10  | 419 | 430 | 15   | 4 | 8   | 107 | 103 | 13   | 7 | 6   | 108 | 70  | 14   |
| 2 | 12  | 316 | 310 | 14   | 4 | 14  | 216 | 246 | 15   | 7 | 8   | 177 | 171 | 17   |
| 2 | 13  | 101 | 105 | 16   | 4 | 16  | 225 | 225 | 15   | 7 | 10  | 138 | 148 | 23   |
| 2 | 15  | 301 | 299 | 14   | 4 | 18  | 135 | 137 | 21   | 7 | 13  | 150 | 176 | 21   |
| 2 | 16  | 186 | 225 | 18   | 5 | -20 | 123 | 125 | 20   | 8 | -16 | 118 | 123 | 18   |
| 2 | 18  | 386 | 366 | 16   | 5 | -17 | 122 | 152 | 18   | 8 | -15 | 118 | 74  | 17   |
| 2 | 19  | 130 | 106 | 19   | 5 | -16 | 158 | 185 | 18   | 8 | -12 | 141 | 123 | 21   |
| 2 | 20  | 195 | 196 | 17   | 5 | -15 | 171 | 190 | 17   | 8 | -6  | 286 | 276 | 15   |
| 2 | 22  | 277 | 291 | 17   | 5 | -14 | 241 | 247 | 14   | 8 | -5  | 179 | 182 | 18   |
| 3 | -20 | 104 | 70  | 16   | 5 | -13 | 181 | 195 | 16   | 8 | -4  | 140 | 164 | 20   |
| 3 | -16 | 203 | 190 | 14   | 5 | -12 | 211 | 240 | 15   | 8 | -2  | 260 | 240 | 15   |
| 3 | -14 | 237 | 238 | 14   | 5 | -11 | 126 | 130 | 13   | 8 | 4   | 159 | 181 | 19   |
| 3 | -13 | 260 | 260 | 13   | 5 | -10 | 237 | 234 | 14   | 8 | 5   | 142 | 140 | 21   |
| 3 | -12 | 103 | 126 | 15   | 5 | -9  | 181 | 201 | 14   | 8 | 6   | 336 | 324 | 15   |
| 3 | -11 | 109 | 37  | 16   | 5 | -7  | 209 | 222 | 14   | 8 | 10  | 148 | 140 | 22   |
| 3 | -10 | 437 | 452 | 15   | 5 | -5  | 114 | 91  | 17   | 8 | 13  | 109 | 106 | 18   |
| 3 | -9  | 123 | 108 | 11   | 5 | -4  | 296 | 300 | 13   | 9 | -8  | 132 | 144 | 18   |
| 3 | -8  | 183 | 188 | 13   | 5 | -2  | 430 | 423 | 16   | 9 | -7  | 153 | 139 | 19   |
| 3 | -5  | 137 | 125 | 13   | 5 | -1  | 113 | 106 | 16   | 9 | -4  | 136 | 116 | 19   |
| 3 | -4  | 325 | 335 | 13   | 5 | 1   | 157 | 162 | 14   | 9 | 2   | 144 | 151 | 19   |

10|Fo| vs 10|Fc|

page 9

| k      | l   | Fo  | Fc     | sigF | k | l   | Fo  | Fc  | sigF | k | l   | Fo  | Fc  | sigF |
|--------|-----|-----|--------|------|---|-----|-----|-----|------|---|-----|-----|-----|------|
| 9      | 8   | 219 | 224    | 17   | 2 | -17 | 121 | 111 | 15   | 4 | -16 | 266 | 251 | 14   |
| 9      | 10  | 167 | 180    | 20   | 2 | -16 | 309 | 331 | 14   | 4 | -14 | 255 | 245 | 14   |
| 10     | 0   | 144 | 154    | 23   | 2 | -10 | 454 | 466 | 16   | 4 | -12 | 285 | 290 | 14   |
|        |     |     |        |      | 2 | -9  | 376 | 368 | 14   | 4 | -10 | 166 | 159 | 14   |
| ^^^^^^ | h = | 6   | ^^^^^^ |      | 2 | -8  | 534 | 544 | 18   | 4 | -9  | 127 | 110 | 17   |
|        |     |     |        |      | 2 | -7  | 169 | 156 | 12   | 4 | -7  | 281 | 283 | 14   |
| 0      | -22 | 201 | 196    | 16   | 2 | -6  | 388 | 397 | 14   | 4 | -6  | 146 | 170 | 15   |
| 0      | -20 | 119 | 109    | 19   | 2 | -5  | 85  | 86  | 14   | 4 | -4  | 477 | 494 | 17   |
| 0      | -18 | 150 | 113    | 17   | 2 | -4  | 297 | 286 | 12   | 4 | -1  | 108 | 122 | 18   |
| 0      | -16 | 166 | 147    | 15   | 2 | -3  | 117 | 104 | 13   | 4 | 0   | 427 | 431 | 15   |
| 0      | -14 | 190 | 196    | 14   | 2 | -2  | 139 | 139 | 13   | 4 | 2   | 246 | 265 | 13   |
| 0      | -12 | 414 | 424    | 15   | 2 | -1  | 231 | 215 | 11   | 4 | 3   | 273 | 277 | 13   |
| 0      | -10 | 190 | 175    | 13   | 2 | 0   | 136 | 154 | 15   | 4 | 4   | 480 | 472 | 17   |
| 0      | -8  | 145 | 129    | 14   | 2 | 2   | 919 | 908 | 28   | 4 | 6   | 127 | 120 | 17   |
| 0      | -2  | 172 | 133    | 11   | 2 | 3   | 248 | 241 | 12   | 4 | 7   | 187 | 186 | 14   |
| 0      | 0   | 494 | 484    | 16   | 2 | 6   | 239 | 229 | 12   | 4 | 8   | 496 | 483 | 17   |
| 0      | 2   | 316 | 308    | 12   | 2 | 7   | 257 | 254 | 12   | 4 | 14  | 120 | 120 | 20   |
| 0      | 4   | 441 | 449    | 15   | 2 | 8   | 291 | 280 | 13   | 4 | 16  | 111 | 112 | 17   |
| 0      | 6   | 523 | 548    | 17   | 2 | 9   | 132 | 160 | 17   | 4 | 18  | 272 | 257 | 16   |
| 0      | 8   | 434 | 440    | 15   | 2 | 10  | 457 | 446 | 16   | 5 | -17 | 108 | 101 | 17   |
| 0      | 10  | 332 | 315    | 13   | 2 | 12  | 182 | 195 | 15   | 5 | -14 | 126 | 130 | 19   |
| 0      | 14  | 278 | 247    | 14   | 2 | 13  | 153 | 157 | 16   | 5 | -12 | 204 | 187 | 15   |
| 0      | 18  | 324 | 326    | 16   | 2 | 14  | 148 | 145 | 17   | 5 | -11 | 143 | 120 | 18   |
| 1      | -20 | 164 | 150    | 16   | 2 | 15  | 142 | 157 | 18   | 5 | -9  | 294 | 288 | 14   |
| 1      | -18 | 109 | 121    | 17   | 2 | 17  | 205 | 215 | 16   | 5 | -7  | 103 | 119 | 16   |
| 1      | -16 | 123 | 136    | 20   | 2 | 20  | 297 | 306 | 16   | 5 | -5  | 172 | 152 | 14   |
| 1      | -15 | 141 | 135    | 17   | 3 | -24 | 175 | 129 | 17   | 5 | -4  | 424 | 449 | 16   |
| 1      | -14 | 303 | 312    | 14   | 3 | -20 | 145 | 135 | 19   | 5 | -3  | 273 | 283 | 14   |
| 1      | -12 | 316 | 325    | 13   | 3 | -19 | 113 | 105 | 18   | 5 | -2  | 170 | 144 | 14   |
| 1      | -10 | 107 | 91     | 12   | 3 | -18 | 205 | 192 | 14   | 5 | -1  | 370 | 380 | 15   |
| 1      | -9  | 124 | 140    | 15   | 3 | -15 | 103 | 98  | 16   | 5 | 4   | 267 | 284 | 14   |
| 1      | -8  | 130 | 132    | 14   | 3 | -14 | 312 | 310 | 14   | 5 | 5   | 97  | 117 | 16   |
| 1      | -7  | 109 | 108    | 17   | 3 | -12 | 347 | 360 | 14   | 5 | 6   | 191 | 190 | 14   |
| 1      | -6  | 362 | 373    | 13   | 3 | -11 | 264 | 274 | 13   | 5 | 7   | 114 | 108 | 15   |
| 1      | -5  | 90  | 106    | 14   | 3 | -10 | 219 | 236 | 14   | 5 | 12  | 177 | 183 | 15   |
| 1      | -4  | 406 | 375    | 14   | 3 | -8  | 145 | 154 | 16   | 5 | 13  | 101 | 112 | 17   |
| 1      | -2  | 568 | 572    | 18   | 3 | -7  | 111 | 115 | 18   | 6 | -20 | 162 | 140 | 20   |
| 1      | -1  | 163 | 165    | 12   | 3 | -5  | 131 | 136 | 16   | 6 | -19 | 124 | 65  | 21   |
| 1      | 0   | 123 | 132    | 15   | 3 | -4  | 140 | 140 | 15   | 6 | -16 | 144 | 133 | 20   |
| 1      | 2   | 227 | 221    | 12   | 3 | -3  | 233 | 217 | 12   | 6 | -10 | 129 | 139 | 15   |
| 1      | 3   | 349 | 346    | 13   | 3 | -2  | 396 | 381 | 14   | 6 | -8  | 148 | 150 | 18   |
| 1      | 4   | 329 | 335    | 13   | 3 | -1  | 148 | 129 | 14   | 6 | -6  | 186 | 165 | 14   |
| 1      | 5   | 415 | 417    | 15   | 3 | 0   | 667 | 666 | 21   | 6 | 0   | 120 | 142 | 14   |
| 1      | 6   | 405 | 404    | 15   | 3 | 2   | 93  | 67  | 14   | 6 | 2   | 346 | 340 | 15   |
| 1      | 7   | 303 | 313    | 13   | 3 | 3   | 124 | 128 | 16   | 6 | 5   | 219 | 242 | 16   |
| 1      | 8   | 123 | 133    | 17   | 3 | 4   | 416 | 413 | 15   | 6 | 7   | 213 | 205 | 15   |
| 1      | 9   | 365 | 365    | 14   | 3 | 5   | 157 | 146 | 14   | 6 | 9   | 131 | 120 | 19   |
| 1      | 10  | 375 | 388    | 14   | 3 | 6   | 345 | 349 | 14   | 6 | 10  | 214 | 196 | 16   |
| 1      | 11  | 145 | 179    | 18   | 3 | 7   | 415 | 422 | 15   | 7 | -14 | 176 | 152 | 17   |
| 1      | 12  | 297 | 295    | 14   | 3 | 9   | 299 | 289 | 13   | 7 | -12 | 150 | 98  | 16   |
| 1      | 13  | 492 | 506    | 17   | 3 | 10  | 247 | 245 | 13   | 7 | -11 | 230 | 232 | 15   |
| 1      | 15  | 135 | 159    | 20   | 3 | 11  | 137 | 146 | 17   | 7 | -8  | 101 | 92  | 17   |
| 1      | 16  | 112 | 111    | 16   | 3 | 13  | 133 | 149 | 15   | 7 | -6  | 111 | 127 | 17   |
| 1      | 18  | 227 | 234    | 16   | 3 | 14  | 232 | 211 | 14   | 7 | -5  | 99  | 72  | 16   |
| 1      | 21  | 164 | 166    | 19   | 3 | 15  | 235 | 252 | 15   | 7 | -2  | 370 | 376 | 15   |
| 1      | 22  | 180 | 173    | 18   | 3 | 16  | 201 | 227 | 16   | 7 | -1  | 297 | 330 | 15   |
| 1      | 24  | 126 | 132    | 19   | 3 | 20  | 148 | 165 | 23   | 7 | 0   | 214 | 227 | 15   |
| 2      | -20 | 115 | 108    | 16   | 3 | 21  | 132 | 105 | 15   | 7 | 4   | 205 | 210 | 16   |
| 2      | -18 | 134 | 170    | 21   | 4 | -22 | 221 | 220 | 17   | 7 | 5   | 136 | 109 | 19   |

10|Fo| vs 10|Fc|

page 10

| k | l   | Fo  | Fc  | sigF | k | l   | Fo  | Fc  | sigF | k | l   | Fo  | Fc  | sigF |
|---|-----|-----|-----|------|---|-----|-----|-----|------|---|-----|-----|-----|------|
| 7 | 6   | 319 | 335 | 16   | 1 | 9   | 162 | 162 | 15   | 3 | 12  | 202 | 185 | 15   |
| 7 | 7   | 194 | 184 | 15   | 1 | 10  | 192 | 175 | 14   | 3 | 15  | 113 | 114 | 17   |
| 7 | 10  | 193 | 203 | 18   | 1 | 11  | 430 | 423 | 16   | 3 | 18  | 243 | 267 | 17   |
| 7 | 15  | 137 | 148 | 17   | 1 | 12  | 106 | 92  | 15   | 4 | -20 | 172 | 185 | 20   |
| 8 | -14 | 136 | 84  | 22   | 1 | 13  | 140 | 138 | 19   | 4 | -12 | 155 | 124 | 17   |
| 8 | -12 | 158 | 151 | 21   | 1 | 14  | 276 | 257 | 14   | 4 | -10 | 304 | 289 | 14   |
| 8 | -10 | 120 | 66  | 19   | 1 | 15  | 124 | 130 | 16   | 4 | -9  | 165 | 157 | 15   |
| 8 | -8  | 125 | 78  | 20   | 1 | 16  | 155 | 133 | 17   | 4 | -8  | 117 | 113 | 15   |
| 8 | -7  | 116 | 118 | 16   | 1 | 17  | 125 | 121 | 20   | 4 | -7  | 158 | 152 | 16   |
| 8 | -6  | 110 | 80  | 16   | 1 | 18  | 226 | 223 | 15   | 4 | -6  | 193 | 233 | 15   |
| 8 | -4  | 247 | 266 | 15   | 1 | 20  | 123 | 143 | 18   | 4 | -5  | 226 | 243 | 14   |
| 8 | -3  | 141 | 113 | 19   | 1 | 23  | 153 | 112 | 19   | 4 | -4  | 251 | 241 | 13   |
| 8 | 0   | 196 | 194 | 16   | 2 | -26 | 145 | 107 | 16   | 4 | -3  | 187 | 170 | 14   |
| 8 | 2   | 113 | 141 | 19   | 2 | -20 | 153 | 142 | 19   | 4 | -2  | 400 | 408 | 15   |
| 8 | 3   | 233 | 225 | 15   | 2 | -19 | 117 | 112 | 17   | 4 | -1  | 174 | 182 | 15   |
| 8 | 4   | 216 | 217 | 16   | 2 | -18 | 219 | 211 | 16   | 4 | 0   | 132 | 136 | 17   |
| 8 | 8   | 201 | 208 | 19   | 2 | -11 | 272 | 280 | 14   | 4 | 1   | 123 | 108 | 18   |
| 9 | -9  | 127 | 112 | 15   | 2 | -10 | 242 | 229 | 13   | 4 | 2   | 135 | 129 | 15   |
| 9 | -6  | 149 | 169 | 22   | 2 | -9  | 492 | 516 | 17   | 4 | 4   | 143 | 139 | 16   |
| 9 | 8   | 111 | 83  | 19   | 2 | -8  | 379 | 380 | 15   | 4 | 5   | 210 | 206 | 13   |
| 9 | 8   | 111 | 83  | 19   | 2 | -7  | 312 | 312 | 13   | 4 | 6   | 384 | 387 | 15   |
| 9 | 8   | 111 | 83  | 19   | 2 | -6  | 218 | 226 | 13   | 4 | 8   | 134 | 128 | 17   |
| 9 | 8   | 111 | 83  | 19   | 2 | -4  | 369 | 372 | 14   | 4 | 9   | 138 | 125 | 17   |
| 9 | 8   | 111 | 83  | 19   | 2 | -2  | 179 | 176 | 12   | 4 | 10  | 187 | 171 | 15   |
| 9 | 8   | 111 | 83  | 19   | 2 | 0   | 431 | 430 | 15   | 4 | 12  | 103 | 88  | 15   |
| 9 | 8   | 111 | 83  | 19   | 2 | 1   | 90  | 80  | 14   | 4 | 16  | 296 | 297 | 16   |
| 9 | 8   | 111 | 83  | 19   | 2 | 2   | 93  | 120 | 15   | 4 | 18  | 133 | 127 | 22   |
| 9 | 8   | 111 | 83  | 19   | 2 | 3   | 288 | 298 | 13   | 5 | -16 | 203 | 175 | 16   |
| 9 | 8   | 111 | 83  | 19   | 2 | 4   | 890 | 913 | 28   | 5 | -15 | 151 | 102 | 15   |
| 9 | 8   | 111 | 83  | 19   | 2 | 7   | 197 | 193 | 13   | 5 | -6  | 315 | 328 | 14   |
| 9 | 8   | 111 | 83  | 19   | 2 | 10  | 177 | 172 | 15   | 5 | -5  | 208 | 197 | 14   |
| 9 | 8   | 111 | 83  | 19   | 2 | 14  | 408 | 424 | 16   | 5 | -2  | 199 | 195 | 14   |
| 9 | 8   | 111 | 83  | 19   | 2 | 16  | 247 | 229 | 16   | 5 | 0   | 190 | 179 | 14   |
| 9 | 8   | 111 | 83  | 19   | 2 | 22  | 125 | 160 | 20   | 5 | 1   | 202 | 207 | 16   |
| 9 | 8   | 111 | 83  | 19   | 3 | -24 | 155 | 93  | 18   | 5 | 2   | 397 | 395 | 16   |
| 9 | 8   | 111 | 83  | 19   | 3 | -22 | 124 | 127 | 17   | 5 | 3   | 294 | 293 | 14   |
| 9 | 8   | 111 | 83  | 19   | 3 | -21 | 148 | 136 | 19   | 5 | 4   | 133 | 164 | 20   |
| 9 | 8   | 111 | 83  | 19   | 3 | -19 | 114 | 161 | 18   | 5 | 6   | 163 | 163 | 15   |
| 9 | 8   | 111 | 83  | 19   | 3 | -18 | 181 | 153 | 17   | 5 | 7   | 110 | 118 | 15   |
| 9 | 8   | 111 | 83  | 19   | 3 | -17 | 110 | 133 | 17   | 5 | 8   | 130 | 83  | 15   |
| 9 | 8   | 111 | 83  | 19   | 3 | -16 | 127 | 150 | 20   | 5 | 10  | 98  | 101 | 17   |
| 9 | 8   | 111 | 83  | 19   | 3 | -14 | 191 | 217 | 16   | 5 | 11  | 159 | 147 | 17   |
| 9 | 8   | 111 | 83  | 19   | 3 | -13 | 208 | 183 | 14   | 5 | 18  | 111 | 82  | 19   |
| 9 | 8   | 111 | 83  | 19   | 3 | -12 | 115 | 120 | 19   | 6 | -18 | 198 | 193 | 18   |
| 9 | 8   | 111 | 83  | 19   | 3 | -10 | 251 | 273 | 15   | 6 | -14 | 121 | 110 | 16   |
| 9 | 8   | 111 | 83  | 19   | 3 | -9  | 218 | 245 | 14   | 6 | -11 | 131 | 88  | 19   |
| 9 | 8   | 111 | 83  | 19   | 3 | -7  | 260 | 257 | 13   | 6 | -10 | 104 | 102 | 16   |
| 9 | 8   | 111 | 83  | 19   | 3 | -6  | 434 | 432 | 16   | 6 | -8  | 241 | 254 | 15   |
| 9 | 8   | 111 | 83  | 19   | 3 | -5  | 139 | 151 | 18   | 6 | -7  | 124 | 100 | 19   |
| 9 | 8   | 111 | 83  | 19   | 3 | -4  | 224 | 239 | 13   | 6 | -6  | 156 | 146 | 16   |
| 9 | 8   | 111 | 83  | 19   | 3 | 0   | 403 | 398 | 15   | 6 | -4  | 221 | 237 | 15   |
| 9 | 8   | 111 | 83  | 19   | 3 | 1   | 205 | 202 | 14   | 6 | -2  | 159 | 145 | 17   |
| 9 | 8   | 111 | 83  | 19   | 3 | 2   | 359 | 357 | 14   | 6 | -1  | 295 | 295 | 15   |
| 9 | 8   | 111 | 83  | 19   | 3 | 3   | 102 | 106 | 15   | 6 | 0   | 359 | 378 | 15   |
| 9 | 8   | 111 | 83  | 19   | 3 | 4   | 169 | 172 | 15   | 6 | 1   | 177 | 208 | 17   |
| 9 | 8   | 111 | 83  | 19   | 3 | 6   | 364 | 374 | 15   | 6 | 4   | 363 | 362 | 16   |
| 9 | 8   | 111 | 83  | 19   | 3 | 8   | 276 | 291 | 13   | 6 | 12  | 185 | 191 | 16   |
| 9 | 8   | 111 | 83  | 19   | 3 | 9   | 274 | 280 | 14   | 6 | 14  | 161 | 106 | 18   |
| 9 | 8   | 111 | 83  | 19   | 3 | 11  | 174 | 182 | 16   | 6 | 16  | 115 | 78  | 17   |

^^^^^^ h = 7 ^^^^^^^

10|Fo| vs 10|Fc|

page 11

| k                    | l   | Fo  | Fc  | sigF | k | l   | Fo  | Fc  | sigF | k | l   | Fo  | Fc  | sigF |
|----------------------|-----|-----|-----|------|---|-----|-----|-----|------|---|-----|-----|-----|------|
| 7                    | -13 | 144 | 148 | 22   | 1 | 15  | 136 | 139 | 21   | 4 | 8   | 166 | 157 | 16   |
| 7                    | -4  | 197 | 225 | 17   | 1 | 16  | 164 | 184 | 21   | 4 | 10  | 126 | 111 | 20   |
| 7                    | -3  | 203 | 201 | 16   | 2 | -24 | 194 | 209 | 21   | 4 | 12  | 155 | 151 | 18   |
| 7                    | -2  | 139 | 135 | 14   | 2 | -18 | 123 | 104 | 20   | 4 | 16  | 154 | 117 | 19   |
| 7                    | -1  | 136 | 152 | 22   | 2 | -16 | 144 | 120 | 17   | 4 | 18  | 123 | 127 | 19   |
| 7                    | 0   | 285 | 290 | 16   | 2 | -14 | 178 | 171 | 16   | 5 | -17 | 153 | 141 | 19   |
| 7                    | 1   | 173 | 148 | 15   | 2 | -12 | 210 | 222 | 15   | 5 | -14 | 126 | 107 | 15   |
| 7                    | 2   | 191 | 177 | 16   | 2 | -11 | 171 | 159 | 15   | 5 | -13 | 123 | 120 | 15   |
| 7                    | 8   | 146 | 150 | 15   | 2 | -9  | 148 | 161 | 17   | 5 | -8  | 254 | 230 | 14   |
| 8                    | -14 | 145 | 117 | 21   | 2 | -6  | 562 | 567 | 19   | 5 | -7  | 177 | 188 | 17   |
| 8                    | -2  | 209 | 240 | 18   | 2 | -5  | 257 | 256 | 14   | 5 | -5  | 214 | 229 | 15   |
| 8                    | 1   | 117 | 117 | 16   | 2 | -4  | 140 | 157 | 16   | 5 | -4  | 273 | 292 | 15   |
| 8                    | 3   | 122 | 95  | 15   | 2 | -2  | 113 | 102 | 19   | 5 | -3  | 162 | 162 | 17   |
| 8                    | 4   | 119 | 76  | 20   | 2 | 0   | 373 | 365 | 14   | 5 | 4   | 235 | 235 | 15   |
| 8                    | 6   | 181 | 194 | 19   | 2 | 2   | 557 | 576 | 19   | 5 | 5   | 177 | 192 | 16   |
| 8                    | 10  | 123 | 123 | 19   | 2 | 6   | 250 | 253 | 14   | 5 | 10  | 122 | 128 | 16   |
| 9                    | -5  | 119 | 104 | 17   | 2 | 7   | 197 | 204 | 15   | 5 | 13  | 141 | 151 | 23   |
| ^^^^^^ h = 8 ^^^^^^^ |     |     |     |      |   |     |     |     |      |   |     |     |     |      |
| 2                    | 8   | 174 | 187 | 16   | 2 | 10  | 103 | 82  | 15   | 5 | 16  | 114 | 111 | 18   |
| 2                    | 10  | 135 | 139 | 21   | 2 | 11  | 135 | 139 | 21   | 6 | -6  | 196 | 211 | 16   |
| 2                    | 12  | 411 | 417 | 17   | 2 | 12  | 411 | 417 | 17   | 6 | -2  | 128 | 114 | 19   |
| 2                    | 13  | 160 | 146 | 17   | 2 | 13  | 160 | 146 | 17   | 6 | 1   | 194 | 202 | 17   |
| 2                    | 14  | 227 | 243 | 16   | 2 | 14  | 227 | 243 | 16   | 6 | 2   | 287 | 294 | 15   |
| 2                    | 16  | 193 | 192 | 17   | 2 | 16  | 193 | 192 | 17   | 6 | 6   | 145 | 131 | 18   |
| 2                    | 18  | 138 | 89  | 19   | 2 | 18  | 138 | 89  | 19   | 6 | 12  | 172 | 171 | 20   |
| 3                    | -22 | 120 | 135 | 19   | 2 | 18  | 138 | 89  | 19   | 6 | 14  | 119 | 98  | 16   |
| 3                    | -20 | 159 | 162 | 15   | 3 | -22 | 120 | 135 | 19   | 7 | -9  | 146 | 111 | 18   |
| 3                    | -17 | 175 | 166 | 16   | 3 | -20 | 159 | 162 | 15   | 7 | -2  | 181 | 195 | 20   |
| 3                    | -16 | 171 | 166 | 17   | 3 | -17 | 175 | 166 | 16   | 7 | -1  | 144 | 158 | 15   |
| 3                    | -14 | 128 | 112 | 20   | 3 | -16 | 171 | 166 | 17   | 7 | 0   | 109 | 138 | 18   |
| 3                    | -10 | 384 | 387 | 15   | 3 | -14 | 128 | 112 | 20   | 7 | 2   | 118 | 116 | 16   |
| 3                    | -9  | 187 | 203 | 17   | 3 | -10 | 384 | 387 | 15   | 7 | 3   | 121 | 163 | 18   |
| 3                    | -8  | 272 | 293 | 14   | 3 | -9  | 187 | 203 | 17   | 8 | -6  | 144 | 125 | 15   |
| 3                    | -6  | 232 | 246 | 14   | 3 | -8  | 272 | 293 | 14   | 8 | 0   | 175 | 202 | 21   |
| 3                    | -5  | 257 | 248 | 14   | 3 | -6  | 232 | 246 | 14   | 8 | 3   | 126 | 79  | 14   |
| ^^^^^^ h = 9 ^^^^^^^ |     |     |     |      |   |     |     |     |      |   |     |     |     |      |
| 3                    | -4  | 161 | 185 | 16   | 3 | -5  | 257 | 248 | 14   | 8 | 3   | 126 | 79  | 14   |
| 3                    | -3  | 425 | 437 | 16   | 3 | -4  | 161 | 185 | 16   | 0 | -10 | 287 | 281 | 14   |
| 3                    | -2  | 445 | 461 | 16   | 3 | -3  | 425 | 437 | 16   | 0 | -8  | 153 | 156 | 17   |
| 3                    | 0   | 239 | 237 | 14   | 3 | -2  | 445 | 461 | 16   | 0 | -6  | 190 | 199 | 14   |
| 3                    | 2   | 399 | 396 | 15   | 3 | 0   | 239 | 237 | 14   | 0 | -2  | 643 | 647 | 21   |
| 3                    | 4   | 293 | 312 | 14   | 3 | 2   | 399 | 396 | 15   | 0 | 2   | 335 | 322 | 14   |
| 3                    | 5   | 181 | 169 | 15   | 3 | 4   | 293 | 312 | 14   | 0 | 8   | 133 | 129 | 20   |
| 3                    | 7   | 155 | 151 | 16   | 3 | 5   | 181 | 169 | 15   | 0 | 10  | 355 | 364 | 16   |
| 3                    | 8   | 370 | 367 | 15   | 3 | 7   | 155 | 151 | 16   | 0 | 14  | 123 | 114 | 16   |
| 3                    | 10  | 233 | 239 | 15   | 3 | 8   | 370 | 367 | 15   | 1 | -16 | 134 | 94  | 19   |
| 3                    | 11  | 118 | 143 | 17   | 3 | 10  | 233 | 239 | 15   | 1 | -15 | 144 | 132 | 18   |
| 3                    | 13  | 140 | 129 | 17   | 3 | 11  | 118 | 143 | 17   | 1 | -14 | 142 | 127 | 19   |
| 3                    | 14  | 175 | 203 | 20   | 3 | 13  | 140 | 129 | 17   | 1 | -12 | 253 | 252 | 15   |
| 3                    | 16  | 179 | 192 | 17   | 3 | 14  | 175 | 203 | 20   | 1 | -11 | 192 | 192 | 16   |
| 4                    | -22 | 133 | 137 | 18   | 3 | 16  | 179 | 192 | 17   | 1 | -9  | 116 | 101 | 15   |
| 4                    | -14 | 138 | 135 | 19   | 4 | -22 | 133 | 137 | 18   | 1 | -8  | 294 | 289 | 14   |
| 4                    | -12 | 186 | 222 | 17   | 4 | -14 | 138 | 135 | 19   | 1 | -7  | 169 | 167 | 17   |
| 4                    | -10 | 172 | 178 | 17   | 4 | -12 | 186 | 222 | 17   | 1 | -6  | 249 | 257 | 14   |
| 4                    | -8  | 292 | 285 | 14   | 4 | -10 | 172 | 178 | 17   | 1 | -5  | 270 | 258 | 14   |
| 4                    | -5  | 123 | 96  | 18   | 4 | -8  | 292 | 285 | 14   | 1 | -4  | 254 | 270 | 14   |
| 4                    | -3  | 127 | 143 | 21   | 4 | -5  | 123 | 96  | 18   | 1 | -3  | 175 | 189 | 16   |
| 4                    | 0   | 427 | 436 | 16   | 4 | -3  | 127 | 143 | 21   | 1 | -1  | 254 | 265 | 14   |
| 4                    | 1   | 134 | 135 | 19   | 4 | 0   | 427 | 436 | 16   | 1 | 0   | 273 | 265 | 14   |
| 4                    | 7   | 100 | 82  | 17   | 4 | 1   | 134 | 135 | 19   | 1 | 0   | 273 | 265 | 14   |

10|Fo| vs 10|Fc|

page 12

| k | l   | Fo  | Fc  | sigF | k      | l      | Fo     | Fc  | sigF | k      | l      | Fo     | Fc  | sigF |
|---|-----|-----|-----|------|--------|--------|--------|-----|------|--------|--------|--------|-----|------|
| 1 | 2   | 100 | 111 | 16   | 5      | 13     | 122    | 38  | 19   | 3      | 14     | 173    | 170 | 20   |
| 1 | 3   | 207 | 188 | 15   | 6      | -14    | 126    | 97  | 16   | 4      | -16    | 119    | 116 | 19   |
| 1 | 4   | 196 | 224 | 14   | 6      | -8     | 173    | 142 | 18   | 4      | -10    | 182    | 179 | 20   |
| 1 | 6   | 237 | 244 | 15   | 6      | -7     | 170    | 161 | 17   | 4      | -8     | 149    | 137 | 20   |
| 1 | 7   | 103 | 110 | 17   | 6      | -4     | 184    | 173 | 16   | 4      | -6     | 114    | 98  | 16   |
| 1 | 8   | 128 | 124 | 15   | 6      | 4      | 206    | 193 | 17   | 4      | -3     | 112    | 130 | 17   |
| 1 | 12  | 214 | 220 | 15   | 6      | 6      | 122    | 124 | 20   | 4      | 0      | 148    | 137 | 20   |
| 1 | 18  | 185 | 172 | 18   | 6      | 8      | 184    | 179 | 18   | 4      | 4      | 190    | 196 | 17   |
| 2 | -22 | 148 | 139 | 22   | 7      | -8     | 193    | 197 | 18   | 4      | 9      | 115    | 111 | 19   |
| 2 | -16 | 242 | 220 | 15   | 7      | 1      | 152    | 167 | 15   | 4      | 10     | 190    | 211 | 17   |
| 2 | -15 | 182 | 180 | 18   | 7      | 4      | 119    | 90  | 16   | 4      | 12     | 186    | 166 | 21   |
| 2 | -14 | 184 | 178 | 18   |        |        |        |     |      | 5      | -14    | 168    | 114 | 17   |
| 2 | -12 | 255 | 290 | 16   | ^^^^^^ | h = 10 | ^^^^^^ |     |      | 5      | -8     | 213    | 218 | 17   |
| 2 | -11 | 135 | 110 | 19   |        |        |        |     |      | 5      | -4     | 197    | 199 | 17   |
| 2 | -10 | 149 | 175 | 18   | 0      | -18    | 170    | 197 | 22   | 5      | 0      | 161    | 147 | 17   |
| 2 | -6  | 121 | 124 | 20   | 0      | -12    | 188    | 171 | 17   | 5      | 2      | 125    | 118 | 16   |
| 2 | -4  | 431 | 424 | 16   | 0      | -10    | 132    | 78  | 17   | 5      | 8      | 174    | 172 | 20   |
| 2 | -3  | 200 | 221 | 14   | 0      | -8     | 206    | 209 | 15   | 5      | 10     | 138    | 114 | 20   |
| 2 | -2  | 109 | 93  | 14   | 0      | -6     | 237    | 225 | 15   | 6      | -6     | 148    | 168 | 22   |
| 2 | -1  | 197 | 210 | 15   | 0      | -4     | 199    | 215 | 16   | 6      | -2     | 176    | 152 | 17   |
| 2 | 0   | 102 | 83  | 15   | 0      | 0      | 512    | 523 | 18   | 6      | 6      | 166    | 183 | 22   |
| 2 | 3   | 184 | 204 | 15   | 0      | 4      | 196    | 197 | 15   | 7      | -6     | 128    | 87  | 21   |
| 2 | 4   | 148 | 145 | 18   | 0      | 10     | 216    | 191 | 15   | 7      | 2      | 119    | 113 | 19   |
| 2 | 5   | 115 | 116 | 14   | 0      | 12     | 232    | 232 | 17   |        |        |        |     |      |
| 2 | 8   | 267 | 275 | 15   | 1      | -19    | 112    | 98  | 19   | ^^^^^^ | h = 11 | ^^^^^^ |     |      |
| 2 | 14  | 235 | 218 | 15   | 1      | -12    | 204    | 205 | 17   |        |        |        |     |      |
| 3 | -18 | 142 | 148 | 16   | 1      | -11    | 145    | 129 | 20   | 0      | -16    | 169    | 146 | 17   |
| 3 | -17 | 112 | 120 | 17   | 1      | -10    | 142    | 176 | 20   | 0      | -10    | 162    | 168 | 20   |
| 3 | -15 | 142 | 132 | 15   | 1      | -8     | 159    | 168 | 18   | 0      | -8     | 108    | 97  | 17   |
| 3 | -12 | 157 | 117 | 16   | 1      | -5     | 140    | 165 | 22   | 0      | -6     | 246    | 247 | 15   |
| 3 | -9  | 130 | 126 | 20   | 1      | -4     | 209    | 223 | 16   | 0      | 0      | 109    | 108 | 17   |
| 3 | -6  | 201 | 200 | 14   | 1      | -3     | 234    | 241 | 15   | 0      | 2      | 372    | 359 | 16   |
| 3 | -4  | 254 | 237 | 14   | 1      | -2     | 122    | 119 | 14   | 0      | 6      | 151    | 168 | 21   |
| 3 | -3  | 100 | 46  | 15   | 1      | 0      | 111    | 120 | 16   | 0      | 10     | 136    | 130 | 16   |
| 3 | -1  | 133 | 155 | 21   | 1      | 2      | 237    | 222 | 14   | 1      | -9     | 197    | 192 | 17   |
| 3 | 0   | 134 | 160 | 21   | 1      | 3      | 101    | 82  | 17   | 1      | -6     | 108    | 98  | 18   |
| 3 | 1   | 150 | 163 | 13   | 1      | 4      | 125    | 130 | 14   | 1      | -5     | 128    | 85  | 19   |
| 3 | 2   | 205 | 214 | 14   | 1      | 8      | 197    | 196 | 16   | 1      | -4     | 124    | 140 | 21   |
| 3 | 7   | 168 | 175 | 18   | 1      | 12     | 134    | 78  | 19   | 1      | -2     | 182    | 155 | 17   |
| 3 | 8   | 145 | 106 | 18   | 1      | 13     | 99     | 6   | 16   | 1      | -1     | 111    | 106 | 17   |
| 3 | 9   | 138 | 139 | 14   | 1      | 16     | 147    | 147 | 16   | 1      | 4      | 207    | 200 | 16   |
| 3 | 10  | 173 | 161 | 16   | 2      | -14    | 221    | 229 | 17   | 1      | 5      | 156    | 98  | 18   |
| 3 | 12  | 221 | 208 | 17   | 2      | -12    | 140    | 100 | 19   | 1      | 6      | 176    | 191 | 18   |
| 4 | -20 | 140 | 144 | 17   | 2      | -10    | 162    | 160 | 18   | 2      | -12    | 140    | 167 | 23   |
| 4 | -12 | 137 | 147 | 21   | 2      | -7     | 97     | 24  | 15   | 2      | -4     | 187    | 184 | 17   |
| 4 | -10 | 283 | 261 | 14   | 2      | -6     | 204    | 185 | 16   | 2      | 0      | 157    | 136 | 18   |
| 4 | -8  | 257 | 238 | 14   | 2      | -2     | 317    | 301 | 15   | 2      | 8      | 205    | 235 | 19   |
| 4 | -3  | 112 | 106 | 16   | 2      | 0      | 124    | 123 | 20   | 3      | -14    | 131    | 142 | 18   |
| 4 | -2  | 358 | 376 | 16   | 2      | 6      | 274    | 272 | 15   | 3      | -11    | 137    | 101 | 20   |
| 4 | 2   | 211 | 207 | 15   | 2      | 10     | 155    | 160 | 18   | 3      | -8     | 136    | 119 | 21   |
| 4 | 3   | 156 | 176 | 18   | 2      | 14     | 190    | 177 | 18   | 3      | -2     | 142    | 146 | 20   |
| 4 | 8   | 169 | 167 | 17   | 3      | -16    | 191    | 156 | 17   | 3      | 4      | 137    | 135 | 19   |
| 4 | 10  | 267 | 272 | 14   | 3      | -15    | 118    | 129 | 19   | 4      | -6     | 181    | 176 | 17   |
| 5 | -7  | 112 | 109 | 17   | 3      | -10    | 199    | 189 | 15   | 4      | 2      | 158    | 139 | 18   |
| 5 | -6  | 273 | 284 | 16   | 3      | -7     | 134    | 140 | 22   | 4      | 6      | 133    | 150 | 18   |
| 5 | -4  | 143 | 164 | 20   | 3      | 0      | 173    | 154 | 15   | 5      | -8     | 117    | 128 | 18   |
| 5 | 6   | 168 | 190 | 20   | 3      | 6      | 120    | 63  | 20   | 5      | -5     | 126    | 46  | 18   |
| 5 | 10  | 133 | 156 | 23   | 3      | 8      | 209    | 222 | 18   | 5      | 4      | 153    | 136 | 22   |
| 5 | 12  | 127 | 154 | 20   | 3      | 11     | 158    | 163 | 21   | 5      | 5      | 116    | 93  | 17   |

10|Fo| vs 10|Fc|

| k | l  | Fo  | Fc  | sigF |
|---|----|-----|-----|------|
| 5 | 6  | 131 | 87  | 17   |
| 5 | 7  | 171 | 120 | 17   |
| 6 | -4 | 181 | 180 | 19   |

^^^^^^ h = 12 ^^^^^^^

|   |     |     |     |    |
|---|-----|-----|-----|----|
| 0 | -8  | 184 | 199 | 19 |
| 0 | -4  | 140 | 144 | 21 |
| 0 | 4   | 190 | 230 | 19 |
| 0 | 10  | 142 | 110 | 20 |
| 1 | -10 | 134 | 109 | 19 |
| 1 | -6  | 115 | 133 | 19 |
| 1 | 0   | 130 | 116 | 22 |
| 1 | 1   | 119 | 116 | 17 |
| 1 | 5   | 154 | 87  | 18 |
| 1 | 6   | 116 | 119 | 18 |
| 2 | -2  | 163 | 167 | 18 |
| 2 | 2   | 116 | 100 | 17 |
| 3 | -12 | 117 | 105 | 19 |
| 3 | 6   | 156 | 141 | 22 |
| 4 | -1  | 135 | 42  | 19 |
| 4 | 4   | 169 | 159 | 20 |

^^^^^^ h = 13 ^^^^^^^

|   |    |     |     |    |
|---|----|-----|-----|----|
| 0 | -6 | 164 | 151 | 21 |
| 0 | -2 | 144 | 160 | 17 |
| 0 | 2  | 147 | 91  | 21 |
| 1 | 3  | 137 | 113 | 22 |
| 2 | -8 | 146 | 107 | 21 |
| 2 | 0  | 154 | 137 | 21 |
